# Supplementary material for: Prosaposin in seminal plasma on the day of oocyte retrieval is associated with normal fertilization and embryo development in in vitro fertilization cycles
Source: PeerJ. 2019 Dec 11;7:e8177. doi: 10.7717/peerj.8177 (PMC6911340; doi:10.7717/peerj.8177)
Supplement: Supplemental Information 2 [file peerj-07-8177-s002.xlsx]

## Sheet: dataperembryo
Cycle ID	Patient ID	Female age	Male age	Embryo_NO.	Fertilization	Early cleavage	cell number on day3	Day3 Score	Fragmentaton on day3	Uneven cleaving on day3	Unsynchronized cleavingon day3		FSH
130581	130462	37	43	1	2PN		8	4	0				8.9
130581	130462	37	43	2	2PN		10	3	0				8.9
130581	130462	37	43	3	2PN		14	2	0				8.9
130581	130462	37	43	4	2PN		7	3	0				8.9
130581	130462	37	43	5	MII	-	-	-	-	-	-	-	8.9
130581	130462	37	43	6	2PN		10	3	0				8.9
130581	130462	37	43	7	MI	-	-	-	-	-	-	-	8.9
131351	131106	30	34	1	2PN		7	2	0	+			6.2
131351	131106	30	34	2	3PN	-	-	-	-	-	-	-	6.2
131351	131106	30	34	3	2PN		8	3	0				6.2
131351	131106	30	34	4	2Pb		5	2	0				6.2
131351	131106	30	34	5	MI	-	-	-	-	-	-	-	6.2
131351	131106	30	34	6	1PN	-	-	-	-	-	-	-	6.2
131351	131106	30	34	7	3PN	-	-	-	-	-	-	-	6.2
131351	131106	30	34	8	>3PN	-	-	-	-	-	-	-	6.2
131351	131106	30	34	9	2PN		6	3	0				6.2
131351	131106	30	34	10	2PN		9	3	0				6.2
131351	131106	30	34	11	MI	-	-	-	-	-	-	-	6.2
131351	131106	30	34	12	degenerate	-	-	-	-	-	-	-	6.2
131580	131291	35	35	1	2PN	-	arrest	-	-	-	-	-	2.8
131574	131285	38	37	1	2PN		arrest	-	-	-	-	-	5.2
131574	131285	38	37	2	3PN	-	-	-	-	-	-	-	5.2
131574	131285	38	37	3	2PN		arrest	-	-	-	-	-	5.2
131575	131286	31	31	1	2Pb		8	4	0				3
131575	131286	31	31	2	2PN		9	3	0				3
131575	131286	31	31	3	2PN		7	3	0				3
131575	131286	31	31	4	2PN		7	3	0				3
131575	131286	31	31	5	2PN		8	3	0				3
131575	131286	31	31	6	3PN	-	-	-	-	-	-	-	3
131575	131286	31	31	7	2Pb		8	3	0				3
131575	131286	31	31	8	MII	-	-	-	-	-	-	-	3
131575	131286	31	31	9	MI	-	-	-	-	-	-	-	3
131575	131286	31	31	10	2PN		8	3	0				3
131575	131286	31	31	11	MII	-	-	-	-	-	-	-	3
131575	131286	31	31	12	2PN		9	3	0				3
131575	131286	31	31	13	2PN		7	2	10	+			3
131594	131299	34	46	1	3PN	-	-	-	-	-	-	-	5.2
131594	131299	34	46	2	2PN		arrest	-	-	-	-	-	5.2
131594	131299	34	46	3	MII	-	-	-	-	-	-	-	5.2
131594	131299	34	46	4	2PN		arrest	-	-	-	-	-	5.2
131595	131300	22	37	1	2PN		Compact	3	0				12.4
131595	131300	22	37	2	2Pb		14	2	0				12.4
131595	131300	22	37	3	2PN		9	3	0	+			12.4
131595	131300	22	37	4	2PN		9	2	20	+			12.4
131595	131300	22	37	5	2Pb		8	3	0				12.4
131595	131300	22	37	6	3PN	-	-	-	-	-	-	-	12.4
131595	131300	22	37	7	2PN		8	3	0				12.4
131595	131300	22	37	8	2Pb		9	3	0				12.4
131595	131300	22	37	9	2PN		10	2	0				12.4
131595	131300	22	37	10	2PN		Compact	3	0				12.4
131595	131300	22	37	11	2PN		8	3	0				12.4
131595	131300	22	37	12	2Pb		Compact	3	0				12.4
131595	131300	22	37	13	1PN		8	3	0				12.4
131595	131300	22	37	14	2PN		14	2	0				12.4
131595	131300	22	37	15	2PN		Compact	3	0				12.4
131595	131300	22	37	16	3PN	-	-	-	-	-	-	-	12.4
131595	131300	22	37	17	2PN		Compact	3	0				12.4
131595	131300	22	37	18	2PN		10	2	0	+			12.4
131595	131300	22	37	19	2Pb		Compact	3	0				12.4
131595	131300	22	37	20	MII	-	-	-	-	-	-	-	12.4
131595	131300	22	37	21	GV	-	-	-	-	-	-	-	12.4
131592	131297	33	37	1	2PN		8	3	0				2.3
131592	131297	33	37	2	2PN		8	3	0				2.3
131592	131297	33	37	3	2PN		9	3	0				2.3
131592	131297	33	37	4	2PN		9	3	0				2.3
131600	131304	32	36	1	1PN		2	1	0				5.2
131600	131304	32	36	2	3PN	-	-	-	-	-	-	-	5.2
131600	131304	32	36	3	2PN		3	1	0				5.2
131600	131304	32	36	4	GV	-	-	-	-	-	-	-	5.2
131600	131304	32	36	5	2PN		Compact	2	0				5.2
131600	131304	32	36	6	2PN		8	3	0	+			5.2
131600	131304	32	36	7	2PN		7	3	0				5.2
131600	131304	32	36	8	2PN		Compact	3	0				5.2
131600	131304	32	36	9	2PN		Compact	2	0				5.2
131600	131304	32	36	10	MII	-	-	-	-	-	-	-	5.2
131600	131304	32	36	11	2PN		5	2	0				5.2
131600	131304	32	36	12	2PN		6	2	0				5.2
131600	131304	32	36	13	MII	-	-	-	-	-	-	-	5.2
131600	131304	32	36	14	2PN		8	3	5	+			5.2
131608	131310	27	28	1	2PN		14	2	0				3.3
131608	131310	27	28	2	2PN		7	2	15	+			3.3
131608	131310	27	28	3	3PN	-	-	-	-	-	-	-	3.3
131608	131310	27	28	4	2PN		9	3	0	+			3.3
131608	131310	27	28	5	2PN		8	3	0				3.3
131608	131310	27	28	6	2PN		8	3	0				3.3
131608	131310	27	28	7	2PN		7	3	0	+			3.3
131608	131310	27	28	8	2PN		8	3	0				3.3
131608	131310	27	28	9	2Pb		9	3	0				3.3
131608	131310	27	28	10	MI	-	-	-	-	-	-	-	3.3
131608	131310	27	28	11	2PN		7	3	0				3.3
131608	131310	27	28	12	3PN	-	-	-	-	-	-	-	3.3
131608	131310	27	28	13	2PN		5	2	0				3.3
131603	110540	31	32	1	MII	-	-	-	-	-	-	-	5.2
131603	110540	31	32	2	2Pb		12	2	0				5.2
131603	110540	31	32	3	2PN		8	3	0	+			5.2
131603	110540	31	32	4	2PN		14	2	0				5.2
131603	110540	31	32	5	MII	-	-	-	-	-	-	-	5.2
131603	110540	31	32	6	2PN		Compact	3	0				5.2
131603	110540	31	32	7	2PN		8	3	0				5.2
131639	131331	24	26	1	MI	-	-	-	-	-	-	-	6.3
131639	131331	24	26	2	2PN		8	3	0				6.3
131639	131331	24	26	3	2PN		8	3	0				6.3
131639	131331	24	26	4	2PN		Compact	3	0				6.3
131639	131331	24	26	5	MII	-	-	-	-	-	-	-	6.3
131639	131331	24	26	6	GV	-	-	-	-	-	-	-	6.3
131639	131331	24	26	7	2PN		12	2	0				6.3
131639	131331	24	26	8	2PN		8	3	0				6.3
131639	131331	24	26	9	GV	-	-	-	-	-	-	-	6.3
131639	131331	24	26	10	2PN		8	3	0				6.3
131639	131331	24	26	11	GV	-	-	-	-	-	-	-	6.3
131639	131331	24	26	12	2PN		8	3	0				6.3
131639	131331	24	26	13	2PN		10	3	0	+			6.3
131622	121904	27	29	1	2PN		6	2	15	+			5.2
131622	121904	27	29	2	2PN		7	3	15				5.2
131622	121904	27	29	3	2PN	2	2	0	0				5.2
131622	121904	27	29	4	2Pb		12	2	0				5.2
131622	121904	27	29	5	3PN	-	-	-	-	-	-	-	5.2
131622	121904	27	29	6	2PN		8	2	0	+			5.2
131622	121904	27	29	7	MI	-	-	-	-	-	-	-	5.2
131622	121904	27	29	8	2PN		8	3	0				5.2
131622	121904	27	29	9	3PN	-	-	-	-	-	-	-	5.2
131622	121904	27	29	10	2PN	2	2	0	0				5.2
131622	121904	27	29	11	2PN		8	2	20	+			5.2
131622	121904	27	29	12	2PN		9	3	0	+			5.2
131622	121904	27	29	13	MI	-	-	-	-	-	-	-	5.2
131622	121904	27	29	14	3PN	-	-	-	-	-	-	-	5.2
131622	121904	27	29	15	degenerate	-	-	-	-	-	-	-	5.2
131666	131355	41	39	1	2PN		arrest	-	-	-	-	-	2.8
131658	131350	27	24	1	2PN		8	3	0				4.4
131658	131350	27	24	2	2PN		7	2	0				4.4
131658	131350	27	24	3	2PN		6	3	0				4.4
131658	131350	27	24	4	3PN	-	-	-	-	-	-	-	4.4
131658	131350	27	24	5	3PN	-	-	-	-	-	-	-	4.4
131658	131350	27	24	6	2PN		8	3	0				4.4
131658	131350	27	24	7	2PN		6	3	0				4.4
131658	131350	27	24	8	2PN		8	3	0				4.4
131658	131350	27	24	9	2PN		8	3	0				4.4
131658	131350	27	24	10	2PN		9	2	0	+			4.4
131626	131322	28	32	1	2PN		8	3	15				5.7
131626	131322	28	32	2	2PN		7	3	0				5.7
131626	131322	28	32	3	MI	-	-	-	-	-	-	-	5.7
131626	131322	28	32	4	2PN		5	2	20				5.7
131626	131322	28	32	5	2Pb		9	3	0				5.7
131626	131322	28	32	6	2PN		5	2	0	+			5.7
131626	131322	28	32	7	2PN		8	3	0				5.7
131626	131322	28	32	8	MII	-	-	-	-	-	-	-	5.7
131626	131322	28	32	9	3PN	-	-	-	-	-	-	-	5.7
131626	131322	28	32	10	degenerate	-	-	-	-	-	-	-	5.7
131626	131322	28	32	11	2PN		4	2	0	+			5.7
131626	131322	28	32	12	2PN		8	3	0				5.7
131626	131322	28	32	13	2PN		8	3	0				5.7
131626	131322	28	32	14	2PN		8	3	0				5.7
131626	131322	28	32	15	2PN		8	3	0				5.7
131626	131322	28	32	16	2PN		8	3	0	+			5.7
131626	131322	28	32	17	MI	-	-	-	-	-	-	-	5.7
131626	131322	28	32	18	2PN		7	3	0				5.7
131626	131322	28	32	19	2PN		7	3	0				5.7
131626	131322	28	32	20	2PN		7	3	0				5.7
131626	131322	28	32	21	3PN	-	-	-	-	-	-	-	5.7
131627	131323	27	38	1	2PN		11	2	0				7.7
131627	131323	27	38	2	2PN		8	3	0				7.7
131627	131323	27	38	3	2PN		8	3	0				7.7
131627	131323	27	38	4	2PN		3	1	0				7.7
131627	131323	27	38	5	MII	-	-	-	-	-	-	-	7.7
131627	131323	27	38	6	2PN		7	3	0				7.7
131627	131323	27	38	7	2PN		4	2	0				7.7
131627	131323	27	38	8	2PN		4	2	0				7.7
131627	131323	27	38	9	3PN	-	-	-	-	-	-	-	7.7
131627	131323	27	38	10	2PN		6	2	0	+			7.7
131628	131324	25	22	1	MII	-	-	-	-	-	-	-	4.4
131628	131324	25	22	2	2PN		Compact	3	0				4.4
131628	131324	25	22	3	MII	-	-	-	-	-	-	-	4.4
131628	131324	25	22	4	2PN		8	3	0				4.4
131628	131324	25	22	5	2Pb		Compact	3	0				4.4
131628	131324	25	22	6	2PN		7	2	0	+			4.4
131628	131324	25	22	7	MII	-	-	-	-	-	-	-	4.4
131628	131324	25	22	8	2Pb		Compact	2	0				4.4
131628	131324	25	22	9	2Pb		10	3	0				4.4
131636	100253	32	37	1	2PN		4	2	0				5.2
131636	100253	32	37	2	2PN		4	2	0				5.2
131636	100253	32	37	3	2PN		5	2	0				5.2
131636	100253	32	37	4	GV	-	-	-	-	-	-	-	5.2
131642	131334	32	30	1	2PN		Compact	3	0				5.5
131642	131334	32	30	2	2PN		8	4	0				5.5
131642	131334	32	30	3	3PN	-	-	-	-	-	-	-	5.5
131642	131334	32	30	4	2PN		9	3	0				5.5
131642	131334	32	30	5	3PN	-	-	-	-	-	-	-	5.5
131642	131334	32	30	6	2PN		Compact	3	0				5.5
131640	131332	30	29	1	degenerate	-	-	-	-	-	-	-	3
131640	131332	30	29	2	degenerate	-	-	-	-	-	-	-	3
131640	131332	30	29	3	2PN		7	3	0				3
131640	131332	30	29	4	2PN		4	2	0				3
131640	131332	30	29	5	2PN		7	3	0				3
131640	131332	30	29	6	2PN		8	3	0				3
131640	131332	30	29	7	degenerate	-	-	-	-	-	-	-	3
131665	131354	34	36	1	GV	-	-	-	-	-	-	-	6.3
131665	131354	34	36	2	degenerate	-	-	-	-	-	-	-	6.3
131665	131354	34	36	3	MII	-	-	-	-	-	-	-	6.3
131665	131354	34	36	4	2PN		arrest	-	-	-	-	-	6.3
131665	131354	34	36	5	GV	-	-	-	-	-	-	-	6.3
131665	131354	34	36	6	2PN		arrest	-	-	-	-	-	6.3
131659	130504	28	29	1	2PN		6	2	0				5.2
131659	130504	28	29	2	2PN		4	2	0				5.2
131659	130504	28	29	3	MII	-	-	-	-	-	-	-	5.2
131659	130504	28	29	4	MII	-	-	-	-	-	-	-	5.2
131659	130504	28	29	5	2PN		8	3	0				5.2
131659	130504	28	29	6	MII	-	-	-	-	-	-	-	5.2
131659	130504	28	29	7	2PN		4	2	0				5.2
131659	130504	28	29	8	MII	-	-	-	-	-	-	-	5.2
131662	120478	31	30	1	MII	-	-	-	-	-	-	-	5.2
131662	120478	31	30	2	2PN		arrest	-	-	-	-	-	5.2
131663	131352	31	34	1	3PN	-	-	-	-	-	-	-	4.8
131663	131352	31	34	2	2PN		arrest	-	-	-	-	-	4.8
131663	131352	31	34	3	2Pb		arrest	-	-	-	-	-	4.8
131663	131352	31	34	4	2Pb		arrest	-	-	-	-	-	4.8
131663	131352	31	34	5	2Pb		arrest	-	-	-	-	-	4.8
131663	131352	31	34	6	2Pb		arrest	-	-	-	-	-	4.8
131663	131352	31	34	7	2Pb		arrest	-	-	-	-	-	4.8
131663	131352	31	34	8	2Pb		arrest	-	-	-	-	-	4.8
131663	131352	31	34	9	2Pb		arrest	-	-	-	-	-	4.8
131663	131352	31	34	10	2Pb		arrest	-	-	-	-	-	4.8
131663	131352	31	34	11	3PN	-	-	-	-	-	-	-	4.8
131663	131352	31	34	12	2Pb		arrest	-	-	-	-	-	4.8
131663	131352	31	34	13	2Pb		arrest	-	-	-	-	-	4.8
131663	131352	31	34	14	2Pb		arrest	-	-	-	-	-	4.8
131663	131352	31	34	15	2Pb		arrest	-	-	-	-	-	4.8
131663	131352	31	34	16	1PN	-	-	-	-	-	-	-	4.8
131663	131352	31	34	17	degenerate	-	-	-	-	-	-	-	4.8
131734	131408	38	38	1	MII	-	-	-	-	-	-	-	6
131734	131408	38	38	2	2PN		7	3	0				6
131730	131404	25	27	1	2PN		8	3	0				5.2
131730	131404	25	27	2	2PN		7	3	0				5.2
131730	131404	25	27	3	2PN		9	3	0				5.2
131730	131404	25	27	4	2PN		8	3	0				5.2
131730	131404	25	27	5	2PN		8	3	0				5.2
131730	131404	25	27	6	2PN		8	3	0				5.2
131730	131404	25	27	7	2PN		9	3	0	+			5.2
131730	131404	25	27	8	MI	-	-	-	-	-	-	-	5.2
131730	131404	25	27	9	3PN	-	-	-	-	-	-	-	5.2
131730	131404	25	27	10	2PN		8	3	0				5.2
131730	131404	25	27	11	3PN	-	-	-	-	-	-	-	5.2
131730	131404	25	27	12	2PN		10	3	0				5.2
131730	131404	25	27	13	2PN		10	3	0				5.2
131730	131404	25	27	14	2PN		8	4	0				5.2
131730	131404	25	27	15	2PN		8	3	0				5.2
131730	131404	25	27	16	2PN		8	4	0				5.2
131730	131404	25	27	17	2PN		8	3	0				5.2
131730	131404	25	27	18	2PN		8	3	0				5.2
131730	131404	25	27	19	2PN		8	3	0				5.2
131730	131404	25	27	20	2PN		7	3	0				5.2
131730	131404	25	27	21	2PN		7	3	0				5.2
131730	131404	25	27	22	3PN	-	-	-	-	-	-	-	5.2
131730	131404	25	27	23	degenerate	-	-	-	-	-	-	-	5.2
131719	130204	35	36	1	2PN		arrest	-	-	-	-	-	4.9
131719	130204	35	36	2	2Pb		arrest	-	-	-	-	-	4.9
131719	130204	35	36	3	2PN		arrest	-	-	-	-	-	4.9
131721	131397	30	32	1	degenerate	-	-	-	-	-	-	-	5.3
131721	131397	30	32	2	2PN		8	4	0				5.3
131721	131397	30	32	3	2PN		5	2	0				5.3
131721	131397	30	32	4	2PN		8	3	15				5.3
131721	131397	30	32	5	2PN		9	3	0				5.3
131721	131397	30	32	6	1PN		3	1	0				5.3
131721	131397	30	32	7	2PN		9	3	0				5.3
131724	131399	29	33	1	2PN		arrest	-	-	-	-	-	6.3
131724	131399	29	33	2	2PN	2PN	arrest	-	-	-	-	-	6.3
131768	131436	34	36	1	MII	-	-	-	-	-	-	-	4.5
131768	131436	34	36	2	2PN		arrest	-	-	-	-	-	4.5
131768	131436	34	36	3	1PN	-	-	-	-	-	-	-	4.5
131768	131436	34	36	4	1PN	-	-	-	-	-	-	-	4.5
131768	131436	34	36	5	degenerate	-	-	-	-	-	-	-	4.5
131768	131436	34	36	6	degenerate	-	-	-	-	-	-	-	4.5
131768	131436	34	36	7	degenerate	-	-	-	-	-	-	-	4.5
131764	131432	30	32	1	2Pb		8	3	0				3.8
131764	131432	30	32	2	MII	-	-	-	-	-	-	-	3.8
131764	131432	30	32	3	2PN		arrest	-	-	-	-	-	3.8
131764	131432	30	32	4	1PN		11	2	10	+			3.8
131764	131432	30	32	5	2Pb		3	1	0				3.8
131764	131432	30	32	6	2Pb		14	2	0				3.8
131765	131433	28	28	1	2PN		Compact	3	0				4.6
131765	131433	28	28	2	2PN		8	3	0				4.6
131765	131433	28	28	3	2PN		Compact	4	0				4.6
131765	131433	28	28	4	2PN		Compact	3	0				4.6
131765	131433	28	28	5	2PN		arrest	-	-	-	-	-	4.6
131765	131433	28	28	6	2PN		Compact	3	0				4.6
131765	131433	28	28	7	2PN		Compact	4	0				4.6
131765	131433	28	28	8	2PN		Compact	3	0				4.6
131770	121404	34	34	1	2PN		arrest	-	-	-	-	-	3.1
131762	131430	24	28	1	2PN		6	2	10	+			5.9
131762	131430	24	28	2	2PN		8	3	0				5.9
131762	131430	24	28	3	2PN		7	3	0	+			5.9
131762	131430	24	28	4	2PN		8	3	0				5.9
131762	131430	24	28	5	2PN		8	3	0				5.9
131762	131430	24	28	6	2PN		6	2	0	+			5.9
131762	131430	24	28	7	2Pb		7	2	10	+			5.9
131762	131430	24	28	8	1PN		9	3	10				5.9
131763	131431	35	39	1	2PN		4	2	0				5.2
131763	131431	35	39	2	degenerate	-	-	-	-	-	-	-	5.2
131763	131431	35	39	3	2PN		7	2	15				5.2
131763	131431	35	39	4	2PN		7	3	0	+			5.2
131763	131431	35	39	5	2PN		9	3	0				5.2
131763	131431	35	39	6	2PN		7	3	0	+			5.2
131763	131431	35	39	7	MII	-	-	-	-	-	-	-	5.2
131763	131431	35	39	8	MI	-	-	-	-	-	-	-	5.2
131763	131431	35	39	9	GV	-	-	-	-	-	-	-	5.2
131763	131431	35	39	10	2PN		4	2	0				5.2
131763	131431	35	39	11	2PN		7	2	0	+			5.2
131763	131431	35	39	12	GV	-	-	-	-	-	-	-	5.2
131763	131431	35	39	13	MI	-	-	-	-	-	-	-	5.2
131763	131431	35	39	14	2Pb		4	2	20				5.2
131773	120262	30	34	1	2Pb		8	3	0				5.2
131773	120262	30	34	2	2PN		9	3	0				5.2
131773	120262	30	34	3	2Pb		14	2	0				5.2
131773	120262	30	34	4	3PN	-	-	-	-	-	-	-	5.2
131773	120262	30	34	5	2PN		13	2	0				5.2
131773	120262	30	34	6	2PN		4	2	10				5.2
131773	120262	30	34	7	2PN		8	3	0				5.2
131773	120262	30	34	8	2PN		9	2	15	+			5.2
131773	120262	30	34	9	2Pb		8	3	0				5.2
131773	120262	30	34	10	2PN		8	3	0				5.2
131773	120262	30	34	11	2PN		8	3	0				5.2
131773	120262	30	34	12	2PN		8	3	0				5.2
131773	120262	30	34	13	2PN		7	3	0	+			5.2
131773	120262	30	34	14	2PN		6	3	0				5.2
131773	120262	30	34	15	2Pb		8	3	0				5.2
131773	120262	30	34	16	2PN		11	2	0				5.2
131773	120262	30	34	17	2PN		9	3	0				5.2
131773	120262	30	34	18	2PN		8	3	0				5.2
181220	180913	28	29	1	2Pb	2	8	3	5	+			5.2
181220	180913	28	29	2	2Pb	2	12	2	0	+			5.2
181220	180913	28	29	3	2PN	2	11	2	5	+			5.2
181220	180913	28	29	4	2Pb	2	8	3	0				5.2
181220	180913	28	29	5	2PN	2	9	3	0	+			5.2
181220	180913	28	29	6	2PN		6	2	10	+			5.2
181220	180913	28	29	7	2PN	2	10	3	0	+			5.2
181220	180913	28	29	8	2PN	2	7	3	0	+			5.2
181220	180913	28	29	9	MII	-	-	-	-	-	-	-	5.2
181220	180913	28	29	10	2PN		11	2	0				5.2
181220	180913	28	29	11	2PN	2	7	3	0				5.2
181220	180913	28	29	12	2PN	2	6	2	0				5.2
181220	180913	28	29	13	MI	-	-	-	-	-	-	-	5.2
181220	180913	28	29	14	2PN	2	8	3	0				5.2
181231	180922	29	32	1	2PN	2	9	3	0				2.7
181231	180922	29	32	2	3PN	-	-	-	-	-	-	-	2.7
181231	180922	29	32	3	3PN	-	-	-	-	-	-	-	2.7
181231	180922	29	32	4	3PN	-	-	-	-	-	-	-	2.7
181231	180922	29	32	5	2PN	2	8	3	0				2.7
181231	180922	29	32	6	2PN		7	3	0				2.7
181231	180922	29	32	7	2PN		8	3	0				2.7
181231	180922	29	32	8	2PN	2	12	2	0				2.7
181231	180922	29	32	9	2PN	2	8	3	0				2.7
181248	180933	33	39	1	2Pb	2	8	3	5				4.2
181248	180933	33	39	2	3PN	-	-	-	-	-	-	-	4.2
181248	180933	33	39	3	2PN	2	14	2	0				4.2
181248	180933	33	39	4	2PN	2	9	3	5				4.2
181248	180933	33	39	5	2PN	2	8	3	0				4.2
181248	180933	33	39	6	2PN	2	7	3	10	+			4.2
181248	180933	33	39	7	2PN	2	9	3	0				4.2
181248	180933	33	39	8	2PN	2	10	3	0				4.2
181248	180933	33	39	9	2PN	2	9	3	10				4.2
181248	180933	33	39	10	2PN	2	5	2	10	+			4.2
181248	180933	33	39	11	2PN	2	8	3	0				4.2
181248	180933	33	39	12	GV	-	-	-	-	-	-	-	4.2
181248	180933	33	39	13	1PN		8	3	5				4.2
181254	180938	43	43	1	2PN		5	2	0				10.5
181254	180938	43	43	2	2PN	2	Compact	3	0				10.5
181254	180938	43	43	3	2PN		8	3	0	+			10.5
181254	180938	43	43	4	2PN	2	7	3	0				10.5
181254	180938	43	43	5	2PN		Compact	2	0				10.5
181254	180938	43	43	6	2PN	2	11	2	0	+			10.5
181254	180938	43	43	7	>3PN	-	-	-	-	-	-	-	10.5
181254	180938	43	43	8	2PN	2	12	2	5	+			10.5
181286	180959	30	35	1	2PN		8	3	5				4.9
181286	180959	30	35	2	2PN		9	2	15	+			4.9
181286	180959	30	35	3	3PN	-	-	-	-	-	-	-	4.9
181286	180959	30	35	4	2PN	2	6	2	10	+			4.9
181286	180959	30	35	5	2PN		6	2	10	+			4.9
181286	180959	30	35	6	2PN	2	8	3	10	+			4.9
181286	180959	30	35	7	2PN	2	8	3	5				4.9
181286	180959	30	35	8	2PN	2	8	3	5				4.9
181286	180959	30	35	9	2PN	2	7	3	0				4.9
181286	180959	30	35	10	degenerate	-	-	-	-	-	-	-	4.9
181288	180961	36	38	1	3PN	-	-	-	-	-	-	-	3.5
181288	180961	36	38	2	2PN		6	2	0	+			3.5
181288	180961	36	38	3	1PN	2	7	3	0	+			3.5
181288	180961	36	38	4	MI	-	-	-	-	-	-	-	3.5
181288	180961	36	38	5	2PN		degenerate		0				3.5
181288	180961	36	38	6	MII	-	-	-	-	-	-	-	3.5
181288	180961	36	38	7	2PN	2	8	3	0	+			3.5
181288	180961	36	38	8	3PN	-	-	-	-	-	-	-	3.5
181288	180961	36	38	9	2PN		8	3	0				3.5
181288	180961	36	38	10	MII	-	-	-	-	-	-	-	3.5
181289	180962	31	31	1	2PN	2	8	4	0				5.2
181289	180962	31	31	2	2PN		2	1	0				5.2
181289	180962	31	31	3	2PN	2	4	2	0				5.2
181289	180962	31	31	4	2PN		4	2	0	+			5.2
181289	180962	31	31	5	2PN	2	10	2	0	++			5.2
181289	180962	31	31	6	2PN	2	8	4	0				5.2
181289	180962	31	31	7	2PN	2	8	3	0				5.2
181289	180962	31	31	8	GV	-	-	-	-	-	-	-	5.2
181289	180962	31	31	9	2PN	2	8	3	0				5.2
181289	180962	31	31	10	GV	-	-	-	-	-	-	-	5.2
181289	180962	31	31	11	3PN	-	-	-	-	-	-	-	5.2
181289	180962	31	31	12	2PN	2	8	3	0				5.2
181289	180962	31	31	13	MII	-	-	-	-	-	-	-	5.2
181290	180963	30	36	1	1PN		8	3	0				3.5
181290	180963	30	36	2	MII	-	-	-	-	-	-	-	3.5
181290	180963	30	36	3	2PN	2	8	3	0				3.5
181290	180963	30	36	4	2PN	2	8	3	0				3.5
181290	180963	30	36	5	1PN	-	-	-	-	-	-	-	3.5
181290	180963	30	36	6	MII	-	-	-	-	-	-	-	3.5
181290	180963	30	36	7	2PN	2	8	3	0				3.5
181290	180963	30	36	8	2PN	2	8	3	0				3.5
181295	180968	29	34	1	2PN		6	2	0				7.8
181295	180968	29	34	2	2PN		Compact	3	0				7.8
181295	180968	29	34	3	2PN		8	3	0	+			7.8
181295	180968	29	34	4	2PN		5	2	0	+			7.8
181295	180968	29	34	5	2PN		8	3	0				7.8
181295	180968	29	34	6	2PN		9	3	0	+			7.8
181295	180968	29	34	7	1PN	-	-	-	-	-	-	-	7.8
181295	180968	29	34	8	2PN	2	10	3	0	+			7.8
181295	180968	29	34	9	2PN		4	2	0				7.8
181295	180968	29	34	10	2PN		8	3	0				7.8
181295	180968	29	34	11	2PN		3	1	0				7.8
181297	180970	31	35	1	1PN	2	8	3	0				5.2
181297	180970	31	35	2	2PN	2	Compact	4	0				5.2
181297	180970	31	35	3	3PN	-	-	-	-	-	-	-	5.2
181297	180970	31	35	4	2PN		Compact	2	0				5.2
181297	180970	31	35	5	3PN	-	-	-	-	-	-	-	5.2
181297	180970	31	35	6	MII	-	-	-	-	-	-	-	5.2
181297	180970	31	35	7	MII	-	-	-	-	-	-	-	5.2
181297	180970	31	35	8	MII	-	-	-	-	-	-	-	5.2
181299	180972	31	33	1	2PN	2	14	2	0	+			2.2
181299	180972	31	33	2	2PN		8	3	0				2.2
181299	180972	31	33	3	3PN	-	-	-	-	-	-	-	2.2
181299	180972	31	33	4	2PN	2	8	3	0				2.2
181299	180972	31	33	5	MII	-	-	-	-	-	-	-	2.2
181299	180972	31	33	6	2PN	2	9	3	0				2.2
181299	180972	31	33	7	MII	-	-	-	-	-	-	-	2.2
181299	180972	31	33	8	3PN	-	-	-	-	-	-	-	2.2
181299	180972	31	33	9	1PN	2	9	3	0	+			2.2
181299	180972	31	33	10	MII	-	-	-	-	-	-	-	2.2
181299	180972	31	33	11	MII	-	-	-	-	-	-	-	2.2
181299	180972	31	33	12	1PN	2	14	2	0				2.2
181299	180972	31	33	13	2PN	2	8	3	0				2.2
181299	180972	31	33	14	2PN	2	9	3	0				2.2
181301	180974	29	29	1	2PN	2	14	2	0				2.6
181301	180974	29	29	2	2PN	2	14	2	0				2.6
181301	180974	29	29	3	2PN		9	3	0	+			2.6
181301	180974	29	29	4	2PN	2	12	2	0				2.6
181301	180974	29	29	5	2PN	2	8	3	0				2.6
181301	180974	29	29	6	degenerate	-	-	-	-	-	-	-	2.6
181301	180974	29	29	7	2PN		8	3	0				2.6
181301	180974	29	29	8	2PN		8	3	0				2.6
181301	180974	29	29	9	2PN		8	3	0	+			2.6
181317	173123	35	44	1	1PN	-	-	-	-	-	-	-	7.2
181317	173123	35	44	2	2PN	2	2	0	0				7.2
181317	173123	35	44	3	2PN		2	1	0				7.2
181317	173123	35	44	4	2PN		2	1	0				7.2
181317	173123	35	44	5	2PN	2	3	1	0				7.2
181317	173123	35	44	6	2PN		4	2	10				7.2
181317	173123	35	44	7	2PN		4	2	10				7.2
181317	173123	35	44	8	2PN		5	2	20	+			7.2
181317	173123	35	44	9	2PN	2	3	1	0				7.2
181317	173123	35	44	10	MI	-	-	-	-	-	-	-	7.2
181317	173123	35	44	11	degenerate	-	-	-	-	-	-	-	7.2
181322	180990	24	24	1	2PN	2	8	3	0				2.7
181322	180990	24	24	2	2PN	2	8	3	0				2.7
181322	180990	24	24	3	2Pb	2	11	2	0				2.7
181322	180990	24	24	4	2PN		8	3	0				2.7
181322	180990	24	24	5	2PN	2	8	3	0				2.7
181322	180990	24	24	6	2PN	3	5	2	0				2.7
181322	180990	24	24	7	1PN	2	7	3	0				2.7
181322	180990	24	24	8	2PN	2	8	4	0				2.7
181322	180990	24	24	9	degenerate	-	-	-	-	-	-	-	2.7
181322	180990	24	24	10	degenerate	-	-	-	-	-	-	-	2.7
181348	181009	23	23	1	3PN	-	-	-	-	-	-	-	3.4
181348	181009	23	23	2	2PN		8	3	0	+			3.4
181348	181009	23	23	3	2PN	2	11	2	0	+			3.4
181348	181009	23	23	4	2PN	2	8	3	0	+			3.4
181348	181009	23	23	5	2PN		5	2	0				3.4
181348	181009	23	23	6	2PN		7	3	0	+			3.4
181348	181009	23	23	7	2PN	2	8	3	0				3.4
181348	181009	23	23	8	2PN		7	3	0				3.4
181348	181009	23	23	9	degenerate	-	-	-	-	-	-	-	3.4
181352	181013	42	40	1	1PN	4	6	2	10	+			6.8
181352	181013	42	40	2	2PN		6	2	0	+			6.8
181352	181013	42	40	3	2PN		Compact	2	0				6.8
181352	181013	42	40	4	2PN		3	1	30				6.8
181352	181013	42	40	5	1PN	2	5	2	0	+			6.8
181352	181013	42	40	6	2PN	2	8	3	0	+			6.8
181352	181013	42	40	7	>3PN	-	-	-	-	-	-	-	6.8
181352	181013	42	40	8	MII	-	-	-	-	-	-	-	6.8
181352	181013	42	40	9	degenerate	-	-	-	-	-	-	-	6.8
181355	181016	33	32	1	2PN		8	3	0	+			2.7
181355	181016	33	32	2	2PN		9	3	0				2.7
181355	181016	33	32	3	>3PN	-	-	-	-	-	-	-	2.7
181355	181016	33	32	4	2PN	2	8	3	0	+			2.7
181355	181016	33	32	5	2PN		8	3	0				2.7
181355	181016	33	32	6	2PN		5	2	0				2.7
181355	181016	33	32	7	2PN		7	3	0				2.7
181355	181016	33	32	8	2PN	2	8	3	0				2.7
181355	181016	33	32	9	2PN	2	8	3	0				2.7
181355	181016	33	32	10	MII	-	-	-	-	-	-	-	2.7
181355	181016	33	32	11	GV	-	-	-	-	-	-	-	2.7
181355	181016	33	32	12	GV	-	-	-	-	-	-	-	2.7
181364	181021	35	35	1	2PN		8	3	0				5.2
181364	181021	35	35	2	2PN		5	2	0				5.2
181364	181021	35	35	3	2PN		8	3	0	+			5.2
181364	181021	35	35	4	2PN		7	3	0				5.2
181364	181021	35	35	5	2PN		8	3	0				5.2
181364	181021	35	35	6	2PN		5	2	0				5.2
181364	181021	35	35	7	2PN	2	8	4	0				5.2
181390	181039	32	34	1	2PN	2	8	3	0				4
181390	181039	32	34	2	GV	-	-	-	-	-	-	-	4
181390	181039	32	34	3	2PN		8	4	0				4
181390	181039	32	34	4	2PN		7	2	15	+			4
181390	181039	32	34	5	2PN		4	2	10				4
181390	181039	32	34	6	2PN	2	7	3	0				4
181390	181039	32	34	7	2PN	2	8	3	5				4
181390	181039	32	34	8	2PN		8	4	0				4
181390	181039	32	34	9	2PN		6	2	0				4
181390	181039	32	34	10	1PN	-	-	-	-	-	-	-	4
181390	181039	32	34	11	3PN	-	-	-	-	-	-	-	4
181390	181039	32	34	12	3PN	-	-	-	-	-	-	-	4
181390	181039	32	34	13	2PN		5	2	20				4
181390	181039	32	34	14	3PN	-	-	-	-	-	-	-	4
181390	181039	32	34	15	>3PN	-	-	-	-	-	-	-	4
181396	181043	36	35	1	2PN		5	2	10				5.2
181396	181043	36	35	2	MII	-	-	-	-	-	-	-	5.2
181396	181043	36	35	3	MII	-	-	-	-	-	-	-	5.2
181396	181043	36	35	4	2PN		6	2	0				5.2
181396	181043	36	35	5	MII	-	-	-	-	-	-	-	5.2
181396	181043	36	35	6	2Pb		7	2	0	+			5.2
181396	181043	36	35	7	2PN		4	2	0				5.2
181396	181043	36	35	8	2PN		8	3	0				5.2
181396	181043	36	35	9	GV	-	-	-	-	-	-	-	5.2
181419	181059	30	32	1	2PN		7	3	0				5.2
181419	181059	30	32	2	2PN		3	1	0				5.2
181419	181059	30	32	3	2PN		7	3	0	+			5.2
181419	181059	30	32	4	GV	-	-	-	-	-	-	-	5.2
181419	181059	30	32	5	1PN	-	-	-	-	-	-	-	5.2
181419	181059	30	32	6	3PN	-	-	-	-	-	-	-	5.2
181419	181059	30	32	7	GV	-	-	-	-	-	-	-	5.2
181419	181059	30	32	8	MII	-	-	-	-	-	-	-	5.2
181419	181059	30	32	9	2PN		8	3	0				5.2
181419	181059	30	32	10	2PN		8	3	0				5.2
181419	181059	30	32	11	2PN		8	3	0				5.2
181419	181059	30	32	12	2PN		4	2	0				5.2
181421	181061	26	33	1	2PN	2	8	3	0				2.8
181421	181061	26	33	2	2PN		7	3	0				2.8
181421	181061	26	33	3	2PN	2	7	3	10	+			2.8
181421	181061	26	33	4	>3PN	-	-	-	-	-	-	-	2.8
181421	181061	26	33	5	2PN	2	8	3	0				2.8
181421	181061	26	33	6	2PN	2	8	3	0				2.8
181421	181061	26	33	7	2PN		12	2	0				2.8
181421	181061	26	33	8	2PN		4	2	0	+			2.8
181421	181061	26	33	9	3PN	-	-	-	-	-	-	-	2.8
181421	181061	26	33	10	2PN		5	2	10				2.8
181421	181061	26	33	11	2PN	2	7	3	5				2.8
181428	172416	33	37	1	2PN	2	8	3	0				3.9
181428	172416	33	37	2	2PN	2	Compact	3	0				3.9
181428	172416	33	37	3	1PN	2	Compact	3	0				3.9
181428	172416	33	37	4	2PN	2	Compact	3	0				3.9
181428	172416	33	37	5	2PN	2	9	3	0	+			3.9
181428	172416	33	37	6	2PN	2	9	3	0				3.9
181428	172416	33	37	7	2PN	2	Compact	2	0				3.9
181428	172416	33	37	8	2PN	2	8	3	0				3.9
181428	172416	33	37	9	MI	-	-	-	-	-	-	-	3.9
181428	172416	33	37	10	degenerate	-	-	-	-	-	-	-	3.9
181430	181066	27	25	1	2PN		7	2	10	++			2.9
181430	181066	27	25	2	2Pb	2	12	2	0				2.9
181430	181066	27	25	3	2PN	2	14	2	0				2.9
181430	181066	27	25	4	2Pb	2	12	2	0				2.9
181430	181066	27	25	5	2Pb	2	14	2	0				2.9
181430	181066	27	25	6	3PN	-	-	-	-	-	-	-	2.9
181430	181066	27	25	7	2PN	2	13	2	0				2.9
181430	181066	27	25	8	2Pb	2	9	2	15	+			2.9
181430	181066	27	25	9	MI	-	-	-	-	-	-	-	2.9
181430	181066	27	25	10	2PN	2	8	3	0				2.9
181430	181066	27	25	11	2PN	2	8	3	0				2.9
181430	181066	27	25	12	2Pb	2	10	3	10				2.9
181430	181066	27	25	13	2PN	4	14	2	0				2.9
181430	181066	27	25	14	3PN	-	-	-	-	-	-	-	2.9
181430	181066	27	25	15	2Pb	2	8	3	5				2.9
181430	181066	27	25	16	2PN	2	9	3	0	+			2.9
181430	181066	27	25	17	2PN	2	8	3	0				2.9
181430	181066	27	25	18	2Pb	2	11	2	10	+			2.9
181433	181069	30	30	1	2PN		8	3	5	+			4.3
181433	181069	30	30	2	2PN		8	3	0				4.3
181433	181069	30	30	3	2PN	2	8	3	0	+			4.3
181433	181069	30	30	4	2PN	2	5	1	20	+			4.3
181433	181069	30	30	5	2PN	2	9	3	5	+			4.3
181433	181069	30	30	6	2PN		11	2	10				4.3
181433	181069	30	30	7	2PN		arrest	-	-	-	-	-	4.3
181433	181069	30	30	8	2PN	2	8	3	0	+			4.3
181433	181069	30	30	9	2PN		5	2	15				4.3
181433	181069	30	30	10	1PN	2	8	2	15	+			4.3
181433	181069	30	30	11	2PN		9	2	15	+			4.3
181433	181069	30	30	12	2PN		8	2	15	+			4.3
181435	170269	38	43	1	3PN	-	-	-	-	-	-	-	2.1
181435	170269	38	43	2	2PN	2	9	3	0				2.1
181435	170269	38	43	3	2PN	2	9	3	0				2.1
181435	170269	38	43	4	2PN		4	2	0				2.1
181435	170269	38	43	5	3PN	-	-	-	-	-	-	-	2.1
181435	170269	38	43	6	2PN		8	3	0				2.1
181435	170269	38	43	7	MI	-	-	-	-	-	-	-	2.1
181435	170269	38	43	8	3PN	-	-	-	-	-	-	-	2.1
181435	170269	38	43	9	2PN		8	3	0				2.1
181435	170269	38	43	10	2PN		6	2	0				2.1
181435	170269	38	43	11	2PN		7	3	0				2.1
181435	170269	38	43	12	GV	-	-	-	-	-	-	-	2.1
181440	181073	43	43	1	2PN		8	3	0				4.6
181440	181073	43	43	2	MII	-	-	-	-	-	-	-	4.6
181440	181073	43	43	3	2PN		2	1	0				4.6
181440	181073	43	43	4	MII	-	-	-	-	-	-	-	4.6
181440	181073	43	43	5	3PN	-	-	-	-	-	-	-	4.6
181440	181073	43	43	6	2PN		8	4	0				4.6
181440	181073	43	43	7	2PN		6	2	0				4.6
181440	181073	43	43	8	MII	-	-	-	-	-	-	-	4.6
181440	181073	43	43	9	GV	-	-	-	-	-	-	-	4.6
181440	181073	43	43	10	2PN		7	3	0				4.6
181440	181073	43	43	11	2PN		6	2	10				4.6
181440	181073	43	43	12	2PN		4	2	5				4.6
181440	181073	43	43	13	GV	-	-	-	-	-	-	-	4.6
181441	181074	34	31	1	2PN	2	5	2	5				3.1
181441	181074	34	31	2	2Pb	2	11	2	0				3.1
181441	181074	34	31	3	2PN	2	11	2	0				3.1
181441	181074	34	31	4	2PN		arrest	-	-	-	-	-	3.1
181441	181074	34	31	5	3PN	-	-	-	-	-	-	-	3.1
181441	181074	34	31	6	2PN	2	11	2	0	+			3.1
181441	181074	34	31	7	2PN	2	8	3	0				3.1
181441	181074	34	31	8	2PN	2	9	3	0	+			3.1
181441	181074	34	31	9	2PN	2	10	3	0				3.1
181441	181074	34	31	10	GV	-	-	-	-	-	-	-	3.1
181441	181074	34	31	11	GV	-	-	-	-	-	-	-	3.1
181446	181078	28	29	1	2PN	2	8	3	5				5.2
181446	181078	28	29	2	2PN	2	9	3	5				5.2
181446	181078	28	29	3	2PN	2	6	2	0				5.2
181446	181078	28	29	4	2PN	2	8	3	5				5.2
181446	181078	28	29	5	2PN		7	3	5				5.2
181446	181078	28	29	6	2PN		7	2	25				5.2
181446	181078	28	29	7	2PN		8	3	0				5.2
181446	181078	28	29	8	2PN		6	2	10				5.2
181446	181078	28	29	9	2PN	2	8	2	15	++			5.2
181446	181078	28	29	10	2PN	2	6	2	0				5.2
181446	181078	28	29	11	2PN	2	8	3	0				5.2
181446	181078	28	29	12	2PN	2	4	1	20				5.2
181446	181078	28	29	13	2PN		4	2	10				5.2
181446	181078	28	29	14	3PN	-	-	-	-	-	-	-	5.2
181456	181084	29	32	1	2PN	2	8	3	5				5.2
181456	181084	29	32	2	MII	-	-	-	-	-	-	-	5.2
181456	181084	29	32	3	MII	-	-	-	-	-	-	-	5.2
181456	181084	29	32	4	MII	-	-	-	-	-	-	-	5.2
181456	181084	29	32	5	2PN	2	9	3	0				5.2
181456	181084	29	32	6	2PN		9	3	5				5.2
181456	181084	29	32	7	MI	-	-	-	-	-	-	-	5.2
181456	181084	29	32	8	MII	-	-	-	-	-	-	-	5.2
181456	181084	29	32	9	MII	-	-	-	-	-	-	-	5.2
181456	181084	29	32	10	MII	-	-	-	-	-	-	-	5.2
181456	181084	29	32	11	MI	-	-	-	-	-	-	-	5.2
181456	181084	29	32	12	MII	-	-	-	-	-	-	-	5.2
181456	181084	29	32	13	2Pb	2	8	3	0				5.2
181456	181084	29	32	14	MII	-	-	-	-	-	-	-	5.2
181456	181084	29	32	15	MII	-	-	-	-	-	-	-	5.2
181457	142450	30	31	1	2PN		9	3	0	+			4.6
181457	142450	30	31	2	2PN		7	3	0	+			4.6
181457	142450	30	31	3	3PN	-	-	-	-	-	-	-	4.6
181457	142450	30	31	4	2PN		6	2	10				4.6
181457	142450	30	31	5	2PN	2	8	3	5				4.6
181457	142450	30	31	6	3PN	-	-	-	-	-	-	-	4.6
181457	142450	30	31	7	2PN	2	9	3	0				4.6
181457	142450	30	31	8	2PN	2	4	2	0				4.6
181468	181090	33	37	1	2PN		4	2	0				5.2
181468	181090	33	37	2	>3PN	-	-	-	-	-	-	-	5.2
181468	181090	33	37	3	2PN	2	Compact	2	0				5.2
181468	181090	33	37	4	1PN		8	2	0	++			5.2
181468	181090	33	37	5	2PN		7	3	5	+			5.2
181468	181090	33	37	6	2PN		6	2	15				5.2
181468	181090	33	37	7	2PN	3	9	2	10				5.2
181468	181090	33	37	8	2PN	2	8	3	0				5.2
181468	181090	33	37	9	2PN		9	3	0	+			5.2
181468	181090	33	37	10	GV	-	-	-	-	-	-	-	5.2
181468	181090	33	37	11	2PN		4	2	0				5.2
181468	181090	33	37	12	2PN	2	6	2	10				5.2
181468	181090	33	37	13	2PN		6	2	0	+			5.2
181468	181090	33	37	14	2PN	2	10	2	5	+			5.2
181468	181090	33	37	15	2PN	2	8	3	0				5.2
181468	181090	33	37	16	3PN	-	-	-	-	-	-	-	5.2
181469	181091	39	43	1	1PN	-	-	-	-	-	-	-	7.3
181469	181091	39	43	2	2PN		8	3	0	+			7.3
181469	181091	39	43	3	2PN		8	4	0				7.3
181469	181091	39	43	4	2PN		6	2	0	+			7.3
181469	181091	39	43	5	2PN		8	4	0				7.3
181469	181091	39	43	6	2PN		arrest	-	-	-	-	-	7.3
181469	181091	39	43	7	2PN		8	4	0				7.3
181469	181091	39	43	8	2PN		5	2	0				7.3
181469	181091	39	43	9	2PN		9	3	0	+			7.3
181469	181091	39	43	10	MI	-	-	-	-	-	-	-	7.3
181470	181092	29	34	1	2PN		arrest	-	-	-	-	-	5.4
181470	181092	29	34	2	2PN	2	7	3	0				5.4
181470	181092	29	34	3	2PN	2	10	2	10				5.4
181470	181092	29	34	4	2PN	2	9	3	5				5.4
181470	181092	29	34	5	2PN	2	7	3	0				5.4
181470	181092	29	34	6	2PN	2	7	3	5				5.4
181470	181092	29	34	7	MII	-	-	-	-	-	-	-	5.4
181470	181092	29	34	8	3PN	-	-	-	-	-	-	-	5.4
181470	181092	29	34	9	3PN	-	-	-	-	-	-	-	5.4
181470	181092	29	34	10	2PN	2	9	3	5				5.4
181470	181092	29	34	11	2PN	2	8	3	5				5.4
181470	181092	29	34	12	2PN	2	8	4	0				5.4
181470	181092	29	34	13	2PN	2	9	2	10	+			5.4
181470	181092	29	34	14	MI	-	-	-	-	-	-	-	5.4
181497	181118	31	33	1	>3PN	-	-	-	-	-	-	-	5.4
181497	181118	31	33	2	2PN		4	1	40				5.4
181497	181118	31	33	3	2PN		3	1	50				5.4
181497	181118	31	33	4	2PN		7	2	10	+			5.4
181497	181118	31	33	5	2PN		5	2	20				5.4
181497	181118	31	33	6	2PN	2	9	3	0				5.4
181497	181118	31	33	7	2PN		7	2	10	+			5.4
181497	181118	31	33	8	2PN		8	3	10				5.4
181497	181118	31	33	9	2PN		7	3	15				5.4
181512	181133	32	36	1	2PN	2	8	4	0				12.3
181512	181133	32	36	2	2PN	2	2	0	0				12.3
181512	181133	32	36	3	2PN		Compact	2	0				12.3
181512	181133	32	36	4	MII	-	-	-	-	-	-	-	12.3
181512	181133	32	36	5	GV	-	-	-	-	-	-	-	12.3
181512	181133	32	36	6	2PN		arrest	-	-	-	-	-	12.3
181512	181133	32	36	7	3PN	-	-	-	-	-	-	-	12.3
181512	181133	32	36	8	2PN	2	8	3	0				12.3
181512	181133	32	36	9	2PN	2	8	3	0				12.3
181512	181133	32	36	10	2PN		8	2	20				12.3
181512	181133	32	36	11	2PN	2	9	3	0	+			12.3
181512	181133	32	36	12	2PN	2	8	3	0				12.3
181515	173000	28	27	1	3PN	-	-	-	-	-	-	-	7
181515	173000	28	27	2	2PN		6	2	5				7
181515	173000	28	27	3	2PN	2	8	3	5				7
181515	173000	28	27	4	2PN		8	3	0				7
181515	173000	28	27	5	3PN	-	-	-	-	-	-	-	7
181515	173000	28	27	6	3PN	-	-	-	-	-	-	-	7
181515	173000	28	27	7	3PN	-	-	-	-	-	-	-	7
181515	173000	28	27	8	2PN	2	8	3	5				7
181515	173000	28	27	9	2PN		8	3	0				7
181515	173000	28	27	10	2PN		7	3	5				7
181515	173000	28	27	11	2PN	2	8	3	10				7
181515	173000	28	27	12	2PN		4	2	5				7
181515	173000	28	27	13	2PN	2	8	3	0				7
181516	181136	29	29	1	2Pb	2	8	3	5				2.5
181516	181136	29	29	2	2PN	2	9	3	10				2.5
181516	181136	29	29	3	2PN	2	8	4	0				2.5
181516	181136	29	29	4	2Pb	4	12	2	0				2.5
181516	181136	29	29	5	2Pb	2	9	3	0				2.5
181516	181136	29	29	6	2PN	2	8	3	5	+			2.5
181516	181136	29	29	7	2PN	2	8	3	0				2.5
181516	181136	29	29	8	MII	-	-	-	-	-	-	-	2.5
181516	181136	29	29	9	2PN	2	8	3	0				2.5
181516	181136	29	29	10	2Pb	2	8	3	0	+			2.5
181526	181144	24	24	1	>3PN	-	-	-	-	-	-	-	4.9
181526	181144	24	24	2	2PN		5	2	5	+			4.9
181526	181144	24	24	3	2PN		8	3	5				4.9
181526	181144	24	24	4	2PN	2	8	3	5				4.9
181526	181144	24	24	5	2PN		8	3	5	+			4.9
181526	181144	24	24	6	2PN		7	2	0	++			4.9
181526	181144	24	24	7	MII	-	-	-	-	-	-	-	4.9
181526	181144	24	24	8	MII	-	-	-	-	-	-	-	4.9
181526	181144	24	24	9	degenerate	-	-	-	-	-	-	-	4.9
181529	181147	31	31	1	3PN	-	-	-	-	-	-	-	6.4
181529	181147	31	31	2	>3PN	-	-	-	-	-	-	-	6.4
181529	181147	31	31	3	2PN	2	9	3	0				6.4
181529	181147	31	31	4	2PN	2	8	3	0				6.4
181529	181147	31	31	5	2PN	2	8	3	0	+			6.4
181529	181147	31	31	6	>3PN	-	-	-	-	-	-	-	6.4
181529	181147	31	31	7	3PN	-	-	-	-	-	-	-	6.4
181529	181147	31	31	8	2PN		8	2	5	++			6.4
181530	181148	24	22	1	2PN	2	12	2	0	+			11
181530	181148	24	22	2	3PN	-	-	-	-	-	-	-	11
181530	181148	24	22	3	2PN	2	13	2	0	+			11
181530	181148	24	22	4	2PN	2	8	3	0				11
181530	181148	24	22	5	2PN		6	2	5				11
181530	181148	24	22	6	2PN	3	10	2	0	++			11
181530	181148	24	22	7	2PN	2	8	3	0	+			11
181530	181148	24	22	8	2PN	2	14	2	0	+			11
181530	181148	24	22	9	2PN	3	14	2	0				11
181530	181148	24	22	10	3PN	-	-	-	-	-	-	-	11
181530	181148	24	22	11	3PN	-	-	-	-	-	-	-	11
181537	181151	26	26	1	2PN		7	2	20	+			8.6
181537	181151	26	26	2	2PN		8	2	25				8.6
181537	181151	26	26	3	1PN	-	-	-	-	-	-	-	8.6
181537	181151	26	26	4	MII	-	-	-	-	-	-	-	8.6
181537	181151	26	26	5	2PN		5	2	20				8.6
181537	181151	26	26	6	2PN		7	2	20				8.6
181537	181151	26	26	7	2PN		6	2	5				8.6
181537	181151	26	26	8	1PN		4	2	10				8.6
181537	181151	26	26	9	2PN	2	8	3	10				8.6
181537	181151	26	26	10	MII	-	-	-	-	-	-	-	8.6
181537	181151	26	26	11	GV	-	-	-	-	-	-	-	8.6
181546	181160	27	31	1	2PN		8	3	0				6.1
181546	181160	27	31	2	1PN	2	Compact	2	0				6.1
181546	181160	27	31	3	MII	-	-	-	-	-	-	-	6.1
181546	181160	27	31	4	2PN		5	2	5				6.1
181546	181160	27	31	5	2Pb		6	2	10	+			6.1
181546	181160	27	31	6	2PN		6	2	0				6.1
181546	181160	27	31	7	2PN		8	3	0				6.1
181546	181160	27	31	8	2PN		Compact	2	0				6.1
181546	181160	27	31	9	degenerate	-	-	-	-	-	-	-	6.1
181548	181161	32	31	1	2PN		5	2	15				3.6
181548	181161	32	31	2	2PN		8	4	0				3.6
181548	181161	32	31	3	MII	-	-	-	-	-	-	-	3.6
181548	181161	32	31	4	2PN		4	2	0				3.6
181548	181161	32	31	5	2PN		arrest	-	-	-	-	-	3.6
181548	181161	32	31	6	MI	-	-	-	-	-	-	-	3.6
181548	181161	32	31	7	2PN		5	1	50				3.6
181548	181161	32	31	8	2PN		7	3	0				3.6
181548	181161	32	31	9	2PN		8	3	0				3.6
181548	181161	32	31	10	2PN	2	8	4	0				3.6
181548	181161	32	31	11	2PN	2	Compact	3	0				3.6
181548	181161	32	31	12	3PN	-	-	-	-	-	-	-	3.6
181548	181161	32	31	13	2PN		9	3	0				3.6
181549	181162	34	34	1	3PN	-	-	-	-	-	-	-	3.3
181549	181162	34	34	2	2PN	2	10	3	0	+			3.3
181549	181162	34	34	3	2PN		8	3	0				3.3
181549	181162	34	34	4	2PN	2	8	3	10				3.3
181549	181162	34	34	5	2PN	2	8	3	10				3.3
181549	181162	34	34	6	2PN		9	2	20				3.3
181549	181162	34	34	7	2PN	2	11	2	0				3.3
181549	181162	34	34	8	2PN	2	11	2	5				3.3
181549	181162	34	34	9	MII	-	-	-	-	-	-	-	3.3
181549	181162	34	34	10	2PN		3	1	10				3.3
181549	181162	34	34	11	2PN	2	12	2	10				3.3
181549	181162	34	34	12	2PN	2	8	3	5				3.3
181549	181162	34	34	13	MII	-	-	-	-	-	-	-	3.3
181549	181162	34	34	14	2PN	2	9	3	0	+			3.3
181549	181162	34	34	15	2PN	2	12	2	5				3.3
181549	181162	34	34	16	2PN	2	10	3	5				3.3
181557	181167	32	34	1	1PN	2	8	3	5				3
181557	181167	32	34	2	2PN	2	8	3	0				3
181557	181167	32	34	3	2Pb	2	10	3	0	+			3
181557	181167	32	34	4	2PN	2	12	2	0	+			3
181557	181167	32	34	5	2PN	2	7	2	0	++			3
181557	181167	32	34	6	2PN		7	2	10	+			3
181557	181167	32	34	7	2PN	2	8	3	0	+			3
181557	181167	32	34	8	2PN	2	8	3	0				3
181557	181167	32	34	9	2PN	2	10	3	5				3
181557	181167	32	34	10	2PN	2	8	3	0				3
181557	181167	32	34	11	2PN		8	3	0				3
181557	181167	32	34	12	2PN		6	2	10				3
181557	181167	32	34	13	GV	-	-	-	-	-	-	-	3
181557	181167	32	34	14	GV	-	-	-	-	-	-	-	3
181559	181169	31	30	1	2PN		3	1	5				11.4
181559	181169	31	30	2	2PN		8	3	0				11.4
181559	181169	31	30	3	MII	-	-	-	-	-	-	-	11.4
181559	181169	31	30	4	2PN		7	2	10	+			11.4
181559	181169	31	30	5	2PN	2	8	3	0				11.4
181559	181169	31	30	6	2PN		2	1	60				11.4
181559	181169	31	30	7	2PN	2	10	3	0	+			11.4
181559	181169	31	30	8	2PN	2	7	3	0				11.4
181559	181169	31	30	9	MII	-	-	-	-	-	-	-	11.4
181559	181169	31	30	10	2PN	2	8	3	0				11.4
181559	181169	31	30	11	2PN		6	2	0				11.4
181560	130589	34	35	1	2PN		6	2	15				5.2
181560	130589	34	35	2	3PN	-	-	-	-	-	-	-	5.2
181560	130589	34	35	3	2PN		3	1	50				5.2
181560	130589	34	35	4	2PN		6	2	5				5.2
181560	130589	34	35	5	2PN	2	7	3	5				5.2
181560	130589	34	35	6	2PN		5	2	5				5.2
181560	130589	34	35	7	2PN	2	8	3	5				5.2
181560	130589	34	35	8	2PN		6	2	20				5.2
181560	130589	34	35	9	MII	-	-	-	-	-	-	-	5.2
181560	130589	34	35	10	3PN	-	-	-	-	-	-	-	5.2
181560	130589	34	35	11	2PN	2	7	3	10				5.2
181560	130589	34	35	12	2PN		6	2	20				5.2
181561	181170	28	30	1	2PN		3	1	0				6.6
181561	181170	28	30	2	2PN		5	2	5				6.6
181561	181170	28	30	3	2PN		3	1	0				6.6
181561	181170	28	30	4	2Pb		7	2	10	+			6.6
181561	181170	28	30	5	2PN		7	2	15	+			6.6
181561	181170	28	30	6	2PN		6	2	10				6.6
181561	181170	28	30	7	2PN		4	2	0				6.6
181561	181170	28	30	8	2PN	2	8	3	5				6.6
181561	181170	28	30	9	1PN	2	2	0	0				6.6
181561	181170	28	30	10	2PN		8	3	0				6.6
181561	181170	28	30	11	1PN		4	1	10				6.6
181561	181170	28	30	12	2PN		8	3	0	+			6.6
181561	181170	28	30	13	2PN		10	3	0				6.6
181561	181170	28	30	14	2PN		4	1	5				6.6
181561	181170	28	30	15	1PN		7	3	0				6.6
181561	181170	28	30	16	2PN		6	2	5	+			6.6
181570	181177	30	33	1	2PN		7	2	0	++			4
181570	181177	30	33	2	2PN		4	2	5				4
181570	181177	30	33	3	2PN		arrest	-	-	-	-	-	4
181570	181177	30	33	4	2PN		8	3	5				4
181570	181177	30	33	5	3PN	-	-	-	-	-	-	-	4
181570	181177	30	33	6	2PN		7	2	15	+			4
181570	181177	30	33	7	2PN		5	2	5				4
181570	181177	30	33	8	2PN		4	1	30				4
181570	181177	30	33	9	2PN		8	2	20				4
181570	181177	30	33	10	2PN	2	10	3	0	+			4
181570	181177	30	33	11	GV	-	-	-	-	-	-	-	4
181570	181177	30	33	12	GV	-	-	-	-	-	-	-	4
181571	181178	27	31	1	3PN	-	-	-	-	-	-	-	3.3
181571	181178	27	31	2	3PN	-	-	-	-	-	-	-	3.3
181571	181178	27	31	3	3PN	-	-	-	-	-	-	-	3.3
181571	181178	27	31	4	2PN		7	3	5				3.3
181571	181178	27	31	5	2PN	2	8	3	5				3.3
181571	181178	27	31	6	2PN	2	5	2	5				3.3
181571	181178	27	31	7	2PN		4	1	30				3.3
181580	181185	29	34	1	2PN		9	3	0				2
181580	181185	29	34	2	2PN	2	9	3	0				2
181580	181185	29	34	3	2PN		arrest	-	-	-	-	-	2
181580	181185	29	34	4	>3PN	-	-	-	-	-	-	-	2
181580	181185	29	34	5	2PN	2	8	3	0				2
181580	181185	29	34	6	2PN	2	8	3	0				2
181580	181185	29	34	7	2PN	2	9	2	0				2
181580	181185	29	34	8	2PN		5	1	30				2
181580	181185	29	34	9	2PN	2	8	3	5				2
181580	181185	29	34	10	2PN	2	8	3	0				2
181580	181185	29	34	11	2PN	2	8	2	0				2
181580	181185	29	34	12	2PN	2	9	3	0				2
181580	181185	29	34	13	2PN	2	6	2	5	+			2
181588	181192	23	27	1	2PN	2	8	3	0				4.5
181588	181192	23	27	2	2PN	2	8	3	0				4.5
181588	181192	23	27	3	2Pb		2	1	0				4.5
181588	181192	23	27	4	2PN	2	8	3	5				4.5
181588	181192	23	27	5	2PN	2	8	3	5				4.5
181588	181192	23	27	6	2PN	2	8	3	5				4.5
181588	181192	23	27	7	2PN	2	7	3	5				4.5
181588	181192	23	27	8	1PN		6	2	0				4.5
181589	181193	23	24	1	2PN		8	3	0				4.7
181589	181193	23	24	2	2PN	2	7	3	0				4.7
181589	181193	23	24	3	2PN		7	3	0	+			4.7
181589	181193	23	24	4	2PN		5	2	0				4.7
181589	181193	23	24	5	2PN	2	7	3	0				4.7
181589	181193	23	24	6	2PN		5	2	0				4.7
181589	181193	23	24	7	2PN	2	8	3	0				4.7
181589	181193	23	24	8	2PN		5	2	5				4.7
181604	181205	29	30	1	MII	-	-	-	-	-	-	-	5.2
181604	181205	29	30	2	2PN	2	7	3	0				5.2
181604	181205	29	30	3	MII	-	-	-	-	-	-	-	5.2
181604	181205	29	30	4	2PN		9	3	0				5.2
181604	181205	29	30	5	MII	-	-	-	-	-	-	-	5.2
181604	181205	29	30	6	2PN	3	8	3	0				5.2
181604	181205	29	30	7	MII	-	-	-	-	-	-	-	5.2
181604	181205	29	30	8	MII	-	-	-	-	-	-	-	5.2
181604	181205	29	30	9	MII	-	-	-	-	-	-	-	5.2
181604	181205	29	30	10	MII	-	-	-	-	-	-	-	5.2
181608	181208	31	30	1	2PN	2	7	3	0				2.7
181608	181208	31	30	2	2PN		2	1	0				2.7
181608	181208	31	30	3	2PN		8	3	0	+			2.7
181608	181208	31	30	4	3PN	-	-	-	-	-	-	-	2.7
181608	181208	31	30	5	3PN	-	-	-	-	-	-	-	2.7
181608	181208	31	30	6	2PN		5	2	0				2.7
181608	181208	31	30	7	2PN		8	4	0				2.7
181608	181208	31	30	8	2PN		10	3	0				2.7
181608	181208	31	30	9	3PN	-	-	-	-	-	-	-	2.7
181608	181208	31	30	10	2PN		8	3	0				2.7
181612	181211	32	32	1	2PN		3	1	0				6.5
181612	181211	32	32	2	2PN	2	6	2	0				6.5
181612	181211	32	32	3	3PN	-	-	-	-	-	-	-	6.5
181612	181211	32	32	4	1PN	2	5	2	5				6.5
181612	181211	32	32	5	1PN	4	14	2	0				6.5
181612	181211	32	32	6	2Pb	2	12	2	0				6.5
181612	181211	32	32	7	2PN	2	9	3	0				6.5
181612	181211	32	32	8	2PN	2	Compact	3	0				6.5
181612	181211	32	32	9	2PN	2	7	3	0				6.5
181612	181211	32	32	10	2PN	2	8	3	0				6.5
181612	181211	32	32	11	3PN	-	-	-	-	-	-	-	6.5
181612	181211	32	32	12	2PN		11	2	0				6.5
181612	181211	32	32	13	2Pb	2	8	3	0				6.5
181612	181211	32	32	14	2PN	2	5	2	0				6.5
181612	181211	32	32	15	3PN	-	-	-	-	-	-	-	6.5
181612	181211	32	32	16	2PN	2	8	3	0				6.5
181613	181212	28	28	1	2PN	2	8	3	0				5.7
181613	181212	28	28	2	2PN		9	3	0				5.7
181613	181212	28	28	3	2PN		5	2	5				5.7
181613	181212	28	28	4	2PN		7	3	0				5.7
181613	181212	28	28	5	2PN		7	2	10	+			5.7
181613	181212	28	28	6	2PN	2	9	3	5				5.7
181613	181212	28	28	7	2PN		8	3	10				5.7
181613	181212	28	28	8	2PN		6	2	0				5.7
181613	181212	28	28	9	2PN		8	3	0				5.7
181613	181212	28	28	10	2PN		8	3	0				5.7
181613	181212	28	28	11	2PN		8	3	5				5.7
181613	181212	28	28	12	2PN		5	2	0	+			5.7
181613	181212	28	28	13	MII	-	-	-	-	-	-	-	5.7
181629	181223	38	42	1	2PN	2	9	3	5				7.4
181629	181223	38	42	2	3PN	-	-	-	-	-	-	-	7.4
181629	181223	38	42	3	2PN		8	2	20				7.4
181629	181223	38	42	4	3PN	-	-	-	-	-	-	-	7.4
181629	181223	38	42	5	2PN		8	3	5				7.4
181629	181223	38	42	6	2PN	2	9	3	0	+			7.4
181629	181223	38	42	7	2PN	5	6	2	15	+			7.4
181629	181223	38	42	8	2PN		5	2	0				7.4
181629	181223	38	42	9	2PN	2	8	3	0				7.4
181629	181223	38	42	10	1PN	-	-	-	-	-	-	-	7.4
181629	181223	38	42	11	2PN	2	7	3	0				7.4
181646	181239	26	24	1	2PN	2	9	3	0				5.6
181646	181239	26	24	2	MI	-	-	-	-	-	-	-	5.6
181646	181239	26	24	3	2PN	2	8	3	0	+			5.6
181646	181239	26	24	4	2PN		Compact	3	0				5.6
181646	181239	26	24	5	2PN	2	10	3	0				5.6
181646	181239	26	24	6	2PN	2	Compact	3	0				5.6
181646	181239	26	24	7	2PN		8	3	0				5.6
181646	181239	26	24	8	2PN	2	Compact	2	0				5.6
181646	181239	26	24	9	2PN	2	8	3	0				5.6
181646	181239	26	24	10	2PN		7	3	0	+			5.6
181646	181239	26	24	11	2PN	2	8	3	0				5.6
181646	181239	26	24	12	2PN	2	9	3	0				5.6
181646	181239	26	24	13	2PN	2	Compact	3	0				5.6
181646	181239	26	24	14	2PN		8	3	0				5.6
181646	181239	26	24	15	2PN	2	6	2	0				5.6
181646	181239	26	24	16	2Pb	2	7	2	5	++			5.6
181649	181242	28	29	1	2PN	2	Compact	4	0				3.7
181649	181242	28	29	2	2PN	2	8	3	0				3.7
181649	181242	28	29	3	2PN		4	2	0				3.7
181649	181242	28	29	4	2PN		8	3	5				3.7
181649	181242	28	29	5	1PN	-	-	-	-	-	-	-	3.7
181649	181242	28	29	6	2PN		Compact	3	0				3.7
181649	181242	28	29	7	2PN	2	8	3	0				3.7
181649	181242	28	29	8	2PN		4	2	0				3.7
181649	181242	28	29	9	3PN	-	-	-	-	-	-	-	3.7
181649	181242	28	29	10	2PN		6	2	0	+			3.7
181649	181242	28	29	11	2PN		7	3	0				3.7
181649	181242	28	29	12	2PN	2	7	3	0				3.7
181649	181242	28	29	13	2PN	2	4	2	0				3.7
181649	181242	28	29	14	3PN	-	-	-	-	-	-	-	3.7
181649	181242	28	29	15	2PN		7	2	15	+			3.7
181655	181247	38	35	1	2PN		8	3	5	+			5.3
181655	181247	38	35	2	2PN	2	9	3	0				5.3
181655	181247	38	35	3	2PN	2	7	2	0	++			5.3
181655	181247	38	35	4	2PN	2	9	3	0				5.3
181655	181247	38	35	5	2Pb	2	10	3	0				5.3
181655	181247	38	35	6	2PN	2	8	3	0				5.3
181655	181247	38	35	7	2PN	2	9	3	0	+			5.3
181655	181247	38	35	8	2PN	2	8	3	5				5.3
181655	181247	38	35	9	2PN	2	9	3	0	+			5.3
181655	181247	38	35	10	2PN	2	9	3	0				5.3
181655	181247	38	35	11	3PN	-	-	-	-	-	-	-	5.3
181655	181247	38	35	12	2PN		12	2	5				5.3
181656	181248	30	29	1	2PN		3	1	30				2.6
181656	181248	30	29	2	2Pb	2	11	2	0				2.6
181656	181248	30	29	3	3PN	-	-	-	-	-	-	-	2.6
181656	181248	30	29	4	2PN		2	1	0				2.6
181656	181248	30	29	5	2PN		4	1	50				2.6
181656	181248	30	29	6	2PN		arrest	-	-	-	-	-	2.6
181656	181248	30	29	7	2PN		degenerate		0				2.6
181656	181248	30	29	8	2PN		8	2	0	++			2.6
181656	181248	30	29	9	2PN		5	1	50				2.6
181656	181248	30	29	10	2PN	2	12	2	0				2.6
181656	181248	30	29	11	2PN	2	3	1	30				2.6
181656	181248	30	29	12	MII	-	-	-	-	-	-	-	2.6
181656	181248	30	29	13	2PN	2	7	3	0				2.6
181656	181248	30	29	14	2PN	2	8	3	0				2.6
181656	181248	30	29	15	2PN	2	8	3	0				2.6
181657	181249	28	26	1	1PN	-	-	-	-	-	-	-	5.8
181657	181249	28	26	2	2PN	2	8	3	0				5.8
181657	181249	28	26	3	3PN	-	-	-	-	-	-	-	5.8
181657	181249	28	26	4	2PN		5	2	10	+			5.8
181657	181249	28	26	5	2PN		8	3	0				5.8
181657	181249	28	26	6	2PN		9	3	0				5.8
181657	181249	28	26	7	2PN	2	7	3	5				5.8
181657	181249	28	26	8	2PN		9	3	0				5.8
181657	181249	28	26	9	2PN	2	14	2	0				5.8
181666	181255	33	32	1	2PN	2	6	2	0				6.7
181666	181255	33	32	2	2PN		10	2	0	++			6.7
181666	181255	33	32	3	2PN		3	1	30				6.7
181666	181255	33	32	4	2PN	2	9	2	15	+			6.7
181666	181255	33	32	5	3PN	-	-	-	-	-	-	-	6.7
181666	181255	33	32	6	2PN	2	8	3	0				6.7
181666	181255	33	32	7	2PN	2	10	3	0				6.7
181666	181255	33	32	8	2PN	2	8	3	0				6.7
181666	181255	33	32	9	3PN	-	-	-	-	-	-	-	6.7
181666	181255	33	32	10	>3PN	-	-	-	-	-	-	-	6.7
181666	181255	33	32	11	2PN		6	2	15				6.7
181666	181255	33	32	12	2PN	2	8	3	5				6.7
181666	181255	33	32	13	2PN	2	8	3	5	+			6.7
181666	181255	33	32	14	GV	-	-	-	-	-	-	-	6.7
181666	181255	33	32	15	GV	-	-	-	-	-	-	-	6.7
181679	181266	25	27	1	MI	-	-	-	-	-	-	-	7.3
181679	181266	25	27	2	2PN	2	8	3	0				7.3
181679	181266	25	27	3	2PN		8	4	0				7.3
181679	181266	25	27	4	2PN	2	11	2	0				7.3
181679	181266	25	27	5	2PN		8	3	0				7.3
181679	181266	25	27	6	2PN	2	7	3	0				7.3
181679	181266	25	27	7	MII	-	-	-	-	-	-	-	7.3
181679	181266	25	27	8	2PN		8	3	0				7.3
181679	181266	25	27	9	2PN		8	3	0				7.3
181679	181266	25	27	10	2PN	2	8	3	5				7.3
181679	181266	25	27	11	3PN	-	-	-	-	-	-	-	7.3
181679	181266	25	27	12	>3PN	-	-	-	-	-	-	-	7.3
181679	181266	25	27	13	2PN		8	3	0				7.3
181709	181287	32	34	1	2PN	2	10	3	0				10.5
181709	181287	32	34	2	2PN	2	8	3	0				10.5
181709	181287	32	34	3	2PN		10	3	0	+			10.5
181709	181287	32	34	4	2PN	2	8	3	10				10.5
181709	181287	32	34	5	2PN		8	3	0				10.5
181709	181287	32	34	6	2PN	2	8	3	0				10.5
181709	181287	32	34	7	2Pb	2	8	3	5				10.5
181709	181287	32	34	8	2PN		4	2	0				10.5
181709	181287	32	34	9	2PN		10	3	0	+			10.5
181709	181287	32	34	10	2PN	2	9	2	0	++			10.5
181709	181287	32	34	11	3PN	-	-	-	-	-	-	-	10.5
181709	181287	32	34	12	2PN	3	11	2	5	+			10.5
181709	181287	32	34	13	3PN	-	-	-	-	-	-	-	10.5
181709	181287	32	34	14	3PN	-	-	-	-	-	-	-	10.5
181709	181287	32	34	15	1PN	-	-	-	-	-	-	-	10.5
181709	181287	32	34	16	MI	-	-	-	-	-	-	-	10.5
181709	181287	32	34	17	2PN		Compact	2	0				10.5
181709	181287	32	34	18	2PN		arrest	-	-	-	-	-	10.5
181709	181287	32	34	19	2PN	2	8	3	0				10.5
181709	181287	32	34	20	2PN		9	3	10				10.5
181715	181292	32	30	1	MII	-	-	-	-	-	-	-	4.2
181715	181292	32	30	2	MII	-	-	-	-	-	-	-	4.2
181715	181292	32	30	3	2PN	2	9	3	5				4.2
181715	181292	32	30	4	MII	-	-	-	-	-	-	-	4.2
181715	181292	32	30	5	2PN	4	6	2	5				4.2
181715	181292	32	30	6	MII	-	-	-	-	-	-	-	4.2
181715	181292	32	30	7	MII	-	-	-	-	-	-	-	4.2
181715	181292	32	30	8	2PN	2	14	2	0				4.2
181715	181292	32	30	9	2PN		9	3	10				4.2
181733	181304	32	31	1	2PN		9	3	5				5.2
181733	181304	32	31	2	2PN		3	1	0				5.2
181733	181304	32	31	3	2PN		arrest	-	-	-	-	-	5.2
181733	181304	32	31	4	2PN		8	3	0				5.2
181733	181304	32	31	5	2PN		7	2	5	+			5.2
181733	181304	32	31	6	3PN	-	-	-	-	-	-	-	5.2
181733	181304	32	31	7	2PN		arrest	-	-	-	-	-	5.2
181733	181304	32	31	8	2PN		10	2	0	+			5.2
181733	181304	32	31	9	MII	-	-	-	-	-	-	-	5.2
181733	181304	32	31	10	1PN	-	-	-	-	-	-	-	5.2
181733	181304	32	31	11	2PN		9	2	5	++			5.2
181733	181304	32	31	12	2PN		7	3	0				5.2
181733	181304	32	31	13	MII	-	-	-	-	-	-	-	5.2
181733	181304	32	31	14	2PN	2	5	2	0				5.2
181733	181304	32	31	15	2PN	2	12	2	0	+			5.2
181733	181304	32	31	16	3PN	-	-	-	-	-	-	-	5.2
181733	181304	32	31	17	2PN	2	7	3	0				5.2
181755	181322	33	38	1	2PN	2	8	3	5				3.8
181755	181322	33	38	2	2PN		8	3	0	+			3.8
181755	181322	33	38	3	2PN		9	2	0	++			3.8
181755	181322	33	38	4	2PN	2	8	3	10				3.8
181755	181322	33	38	5	2PN	2	8	3	0				3.8
181755	181322	33	38	6	3PN	-	-	-	-	-	-	-	3.8
181755	181322	33	38	7	MII	-	-	-	-	-	-	-	3.8
181755	181322	33	38	8	2PN	2	7	3	0				3.8
181755	181322	33	38	9	degenerate	-	-	-	-	-	-	-	3.8
181758	181325	35	37	1	2PN		11	2	5	+			4.9
181758	181325	35	37	2	MII	-	-	-	-	-	-	-	4.9
181758	181325	35	37	3	2PN		Compact	2	0				4.9
181758	181325	35	37	4	MI	-	-	-	-	-	-	-	4.9
181758	181325	35	37	5	2Pb	2	8	3	0				4.9
181758	181325	35	37	6	2PN		5	2	0	+			4.9
181758	181325	35	37	7	2Pb		2	1	0				4.9
181758	181325	35	37	8	MII	-	-	-	-	-	-	-	4.9
181758	181325	35	37	9	2PN		6	2	0	+			4.9
181758	181325	35	37	10	2PN		10	3	0				4.9
181759	181326	32	30	1	2PN		8	3	0				3.1
181759	181326	32	30	2	2PN		8	4	0				3.1
181759	181326	32	30	3	1PN	2	7	3	0				3.1
181759	181326	32	30	4	2PN		6	2	0				3.1
181759	181326	32	30	5	2PN		8	3	5	+			3.1
181759	181326	32	30	6	2PN		8	3	5				3.1
181759	181326	32	30	7	2PN		7	3	0				3.1
181759	181326	32	30	8	2PN	2	10	3	0				3.1
181759	181326	32	30	9	2PN		8	3	0				3.1
181759	181326	32	30	10	2Pb		8	3	5				3.1
181777	181338	31	31	1	2PN		8	3	0				5.2
181777	181338	31	31	2	MII	-	-	-	-	-	-	-	5.2
181777	181338	31	31	3	3PN	-	-	-	-	-	-	-	5.2
181777	181338	31	31	4	2PN		8	3	0				5.2
181777	181338	31	31	5	2PN		5	2	10				5.2
181777	181338	31	31	6	2PN		8	3	5				5.2
181777	181338	31	31	7	MI	-	-	-	-	-	-	-	5.2
181777	181338	31	31	8	2PN		9	3	5				5.2
181777	181338	31	31	9	2PN		10	3	0	+			5.2
181777	181338	31	31	10	2PN	2	8	3	0				5.2
181777	181338	31	31	11	2PN		8	3	0				5.2
181777	181338	31	31	12	2PN		8	2	0	++			5.2
181777	181338	31	31	13	1PN	2	6	2	5				5.2
181777	181338	31	31	14	2PN		8	3	0				5.2
181777	181338	31	31	15	2PN		8	3	0				5.2
181777	181338	31	31	16	1PN		8	2	0	++			5.2
181785	181345	30	32	1	2Pb	2	5	2	10				7.8
181785	181345	30	32	2	2PN	2	14	2	0				7.8
181785	181345	30	32	3	>3PN	-	-	-	-	-	-	-	7.8
181785	181345	30	32	4	2PN		10	2	15	+			7.8
181785	181345	30	32	5	2PN	2	9	3	0	+			7.8
181785	181345	30	32	6	3PN	-	-	-	-	-	-	-	7.8
181785	181345	30	32	7	2PN	2	10	3	5				7.8
181785	181345	30	32	8	2PN	2	8	2	0	++			7.8
181785	181345	30	32	9	2PN	2	Compact	2	0				7.8
181785	181345	30	32	10	2PN	2	8	3	0				7.8
181785	181345	30	32	11	2PN	2	8	3	0				7.8
181786	181346	36	39	1	2PN	2	4	2	0				7.4
181786	181346	36	39	2	2PN	2	8	3	0				7.4
181786	181346	36	39	3	3PN	-	-	-	-	-	-	-	7.4
181786	181346	36	39	4	2Pb	4	14	2	0				7.4
181786	181346	36	39	5	2PN	2	8	3	0				7.4
181786	181346	36	39	6	3PN	-	-	-	-	-	-	-	7.4
181786	181346	36	39	7	2PN	2	11	2	0				7.4
181786	181346	36	39	8	2PN	2	Compact	3	0				7.4
181786	181346	36	39	9	degenerate	-	-	-	-	-	-	-	7.4
181787	181347	33	41	1	2PN		6	2	20				20.8
181787	181347	33	41	2	2PN		5	1	50				20.8
181787	181347	33	41	3	2PN	2	7	3	0				20.8
181787	181347	33	41	4	2PN		9	2	20				20.8
181787	181347	33	41	5	3PN	-	-	-	-	-	-	-	20.8
181787	181347	33	41	6	3PN	-	-	-	-	-	-	-	20.8
181787	181347	33	41	7	2PN	2	6	2	20				20.8
181787	181347	33	41	8	2PN	2	10	2	0	++			20.8
181787	181347	33	41	9	2PN		8	2	20				20.8
181787	181347	33	41	10	2PN		8	3	0	+			20.8
181787	181347	33	41	11	2PN	2	8	3	0				20.8
181787	181347	33	41	12	2PN	2	14	2	5				20.8
181787	181347	33	41	13	2PN		arrest	-	-	-	-	-	20.8
181787	181347	33	41	14	3PN	-	-	-	-	-	-	-	20.8
181787	181347	33	41	15	2PN	2	8	3	5				20.8
181787	181347	33	41	16	2PN	2	5	2	5				20.8
181794	181353	34	34	1	2PN		5	1	20	+			5.2
181794	181353	34	34	2	2Pb		3	1	40				5.2
181794	181353	34	34	3	2PN		5	1	20	+			5.2
181794	181353	34	34	4	2PN		7	2	15	++			5.2
181794	181353	34	34	5	2PN	2	4	1	20	+			5.2
181794	181353	34	34	6	MI	-	-	-	-	-	-	-	5.2
181794	181353	34	34	7	2PN		5	1	25				5.2
181794	181353	34	34	8	2PN		7	2	25	+			5.2
181794	181353	34	34	9	2PN		4	1	15	+			5.2
181794	181353	34	34	10	MII	-	-	-	-	-	-	-	5.2
181794	181353	34	34	11	GV	-	-	-	-	-	-	-	5.2
181803	181362	34	35	1	2PN	2	9	2	0	++			7.1
181803	181362	34	35	2	3PN	-	-	-	-	-	-	-	7.1
181803	181362	34	35	3	2PN		8	3	0				7.1
181803	181362	34	35	4	2PN		Compact	4	0				7.1
181803	181362	34	35	5	3PN	-	-	-	-	-	-	-	7.1
181803	181362	34	35	6	2PN	2	Compact	4	0				7.1
181803	181362	34	35	7	3PN	-	-	-	-	-	-	-	7.1
181803	181362	34	35	8	2PN	2	Compact	3	0				7.1
181803	181362	34	35	9	3PN	-	-	-	-	-	-	-	7.1
181803	181362	34	35	10	MII	-	-	-	-	-	-	-	7.1
181803	181362	34	35	11	3PN	-	-	-	-	-	-	-	7.1
181803	181362	34	35	12	2PN	2	8	3	0				7.1
181803	181362	34	35	13	2PN	2	8	4	0				7.1
181803	181362	34	35	14	GV	-	-	-	-	-	-	-	7.1
181809	181367	35	35	1	2PN		9	2	15	+			6.2
181809	181367	35	35	2	2PN		7	2	15	+			6.2
181809	181367	35	35	3	2PN	2	8	3	15	+			6.2
181809	181367	35	35	4	2PN		9	3	10				6.2
181809	181367	35	35	5	2PN		degenerate		0				6.2
181809	181367	35	35	6	MII	-	-	-	-	-	-	-	6.2
181809	181367	35	35	7	2PN		8	3	0				6.2
181809	181367	35	35	8	GV	-	-	-	-	-	-	-	6.2
181811	181369	29	33	1	MI	-	-	-	-	-	-	-	8.2
181811	181369	29	33	2	>3PN	-	-	-	-	-	-	-	8.2
181811	181369	29	33	3	1PN	2	8	3	0				8.2
181811	181369	29	33	4	3PN	-	-	-	-	-	-	-	8.2
181811	181369	29	33	5	2PN		8	3	0				8.2
181811	181369	29	33	6	2PN		6	2	0				8.2
181811	181369	29	33	7	2PN	2	8	4	0				8.2
181811	181369	29	33	8	2PN	2	8	4	0				8.2
181811	181369	29	33	9	2PN		8	3	10	+			8.2
181811	181369	29	33	10	2PN	2	8	3	0				8.2
181811	181369	29	33	11	2PN		8	3	0				8.2
181811	181369	29	33	12	2PN		8	3	0				8.2
181811	181369	29	33	13	2PN		4	2	0				8.2
181828	173104	28	32	1	2PN		5	2	0				5.2
181828	173104	28	32	2	MI	-	-	-	-	-	-	-	5.2
181828	173104	28	32	3	2PN		9	3	0	+			5.2
181828	173104	28	32	4	1PN	-	-	-	-	-	-	-	5.2
181828	173104	28	32	5	2PN		8	3	0				5.2
181828	173104	28	32	6	2PN		7	3	0				5.2
181828	173104	28	32	7	2PN		Compact	2	0				5.2
181828	173104	28	32	8	2PN		8	3	0				5.2
181828	173104	28	32	9	2PN		8	3	0				5.2
181828	173104	28	32	10	2PN		4	2	0				5.2
181828	173104	28	32	11	2PN		10	3	0				5.2
181849	181394	27	36	1	2PN	2C	8	2	20				5.2
181849	181394	27	36	2	2PN	2C	8	3	5				5.2
181849	181394	27	36	3	0PN	-	-	-	-	-	-	-	5.2
181849	181394	27	36	4	2PN	2C	8	2	0	+			5.2
181849	181394	27	36	5	2PN		5	2	5				5.2
181849	181394	27	36	6	2PN		8	3	0				5.2
181849	181394	27	36	7	2PN		9	3	0				5.2
181849	181394	27	36	8	2PN	2C	8	3	5				5.2
181849	181394	27	36	9	2PN	2C	7	2	5	+			5.2
181849	181394	27	36	10	2PN	2C	6	2	0	+			5.2
181852	181397	28	27	1	2Pb	2C	8	3	5				3.4
181852	181397	28	27	2	2PN	2C	8	3	5				3.4
181852	181397	28	27	3	2PN	2C	7	2	20				3.4
181852	181397	28	27	4	2PN		5	2	0				3.4
181852	181397	28	27	5	2Pb	2C	9	3	10				3.4
181852	181397	28	27	6	2PN	2C	7	3	0				3.4
181852	181397	28	27	7	2PN	2C	8	3	5				3.4
181852	181397	28	27	8	2PN	2C	8	3	5				3.4
181852	181397	28	27	9	2PN	2C	8	3	5	+			3.4
181852	181397	28	27	10	2PN		6	2	20				3.4
181852	181397	28	27	11	2PN	2C	8	3	10				3.4
181852	181397	28	27	12	2PN	2C	8	3	5				3.4
181860	181405	28	31	1	3PN	-	-	-	-	-	-	-	3.8
181860	181405	28	31	2	3PN	-	-	-	-	-	-	-	3.8
181860	181405	28	31	3	2PN		6	2	5				3.8
181860	181405	28	31	4	3PN	-	-	-	-	-	-	-	3.8
181860	181405	28	31	5	2PN		11	2	0				3.8
181860	181405	28	31	6	3PN	-	-	-	-	-	-	-	3.8
181860	181405	28	31	7	2PN		8	3	0				3.8
181860	181405	28	31	8	2Pb		4	2	0				3.8
181860	181405	28	31	9	1PN		8	3	0				3.8
181860	181405	28	31	10	GV	-	-	-	-	-	-	-	3.8
181868	180567	32	28	1	2PN	2C	13	2	0				4
181868	180567	32	28	2	2PN	2C	8	3	0				4
181868	180567	32	28	3	2PN		7	3	0				4
181868	180567	32	28	4	2PN	2C	6	2	0				4
181868	180567	32	28	5	2PN		Compact	2	0				4
181868	180567	32	28	6	2PN		4	2	0				4
181868	180567	32	28	7	2PN		7	3	0				4
181868	180567	32	28	8	1PN	2C	Compact	3	0				4
181821	181376	30	37	1	2PN	2	8	3	0				3.8
181821	181376	30	37	2	2PN	2	6	2	10				3.8
181821	181376	30	37	3	2PN	2	8	3	5				3.8
181821	181376	30	37	4	2PN	2	6	2	5				3.8
181821	181376	30	37	5	2PN	2	6	2	15				3.8
181821	181376	30	37	6	2PN	2	9	3	0	+			3.8
181821	181376	30	37	7	0PN	-	-	-	-	-	-	-	3.8
181821	181376	30	37	8	2PN		4	1	0				3.8
181821	181376	30	37	9	2PN	2	14	2	0				3.8
181821	181376	30	37	10	GV	-	-	-	-	-	-	-	3.8
181824	181379	27	28	1	2PN		8	3	0				6.6
181824	181379	27	28	2	2PN		6	2	10	+			6.6
181824	181379	27	28	3	2PN		14	2	5				6.6
181824	181379	27	28	4	2PN		9	2	5	+			6.6
181824	181379	27	28	5	2PN		7	3	5	+			6.6
181824	181379	27	28	6	3PN	-	-	-	-	-	-	-	6.6
181824	181379	27	28	7	2PN		8	3	0	+			6.6
181824	181379	27	28	8	2PN		3	1	0				6.6
181824	181379	27	28	9	2PN		8	3	5				6.6
181824	181379	27	28	10	2PN		9	3	0	+			6.6
181824	181379	27	28	11	MII	-	-	-	-	-	-	-	6.6
181824	181379	27	28	12	2PN	2	8	3	0				6.6
181824	181379	27	28	13	3PN	-	-	-	-	-	-	-	6.6
181824	181379	27	28	14	3PN	-	-	-	-	-	-	-	6.6
181824	181379	27	28	15	degenerate	-	-	-	-	-	-	-	6.6
181825	131473	28	33	1	MI	-	-	-	-	-	-	-	5.2
181825	131473	28	33	2	0PN	-	-	-	-	-	-	-	5.2
181825	131473	28	33	3	2PN	2	8	3	5				5.2
181825	131473	28	33	4	2PN	2	11	2	5				5.2
181825	131473	28	33	5	2PN	2	8	3	0				5.2
181825	131473	28	33	6	2PN	2	9	3	5				5.2
181825	131473	28	33	7	2PN		9	3	5				5.2
181825	131473	28	33	8	2PN		7	3	0	+			5.2
181825	131473	28	33	9	2PN		8	3	0				5.2
181825	131473	28	33	10	2PN		8	3	0				5.2
181874	181415	28	35	1	2PN	2C	8	3	5				5
181874	181415	28	35	2	2PN	2C	8	3	0				5
181874	181415	28	35	3	2PN		8	3	5	+			5
181874	181415	28	35	4	2PN	2C	8	3	0				5
181874	181415	28	35	5	0PN	2C	8	4	0				5
181874	181415	28	35	6	2PN	2C	6	2	15				5
181874	181415	28	35	7	2PN	2C	7	3	0				5
181874	181415	28	35	8	2PN	2C	8	3	5				5
181874	181415	28	35	9	1PN	2C	Compact	3	0				5
181874	181415	28	35	10	0PN	-	-	-	-	-	-	-	5
181874	181415	28	35	11	2PN	2C	7	3	0				5
181874	181415	28	35	12	2PN		4	2	10				5
181874	181415	28	35	13	2PN	2C	6	2	5				5
181878	181419	34	34	1	2PN		9	3	0				5.2
181878	181419	34	34	2	2PN		8	3	0				5.2
181878	181419	34	34	3	2PN	2C	8	3	5				5.2
181878	181419	34	34	4	2PN	2C	8	3	0	+			5.2
181878	181419	34	34	5	2PN	2C	7	3	0				5.2
181878	181419	34	34	6	2PN	2C	8	3	0				5.2
181878	181419	34	34	7	2PN	2C	8	3	5				5.2
181878	181419	34	34	8	2PN	2C	6	2	0				5.2
181878	181419	34	34	9	2PN	2C	8	3	0				5.2
181885	181424	29	31	1	2PN	2C	8	4	0				5.2
181885	181424	29	31	2	2PN	2C	10	3	0				5.2
181885	181424	29	31	3	2PN	2C	8	3	0				5.2
181885	181424	29	31	4	2PN	2C	8	3	5				5.2
181885	181424	29	31	5	2PN	2C	8	3	0				5.2
181885	181424	29	31	6	2PN		9	3	0	+			5.2
181885	181424	29	31	7	2PN	2C	8	3	0				5.2
181885	181424	29	31	8	2PN	2C	9	3	0				5.2
181885	181424	29	31	9	2PN		8	3	5				5.2
181885	181424	29	31	10	2PN	2C	8	3	0				5.2
181885	181424	29	31	11	3PN	-	-	-	-	-	-	-	5.2
181901	181438	30	35	1	2PN	2C	7	3	0				5.7
181901	181438	30	35	2	2PN		5	2	0				5.7
181901	181438	30	35	3	2PN	2C	8	3	0				5.7
181901	181438	30	35	4	2PN		8	3	5				5.7
181901	181438	30	35	5	2PN	2C	8	3	5				5.7
181901	181438	30	35	6	2PN	2C	8	3	0				5.7
181901	181438	30	35	7	2PN		8	3	0				5.7
181901	181438	30	35	8	2PN		6	2	5				5.7
181901	181438	30	35	9	2PN		10	3	0				5.7
181901	181438	30	35	10	2PN	2C	7	3	0				5.7
181901	181438	30	35	11	1PN	2C	8	3	0	+			5.7
181901	181438	30	35	12	2PN		6	2	0				5.7
181901	181438	30	35	13	degenerate	-	-	-	-	-	-	-	5.7
181904	181440	31	28	1	degenerate	-	-	-	-	-	-	-	4
181904	181440	31	28	2	2PN	2C	7	3	0				4
181904	181440	31	28	3	2PN	2C	8	3	0				4
181904	181440	31	28	4	2PN	2C	9	3	0				4
181904	181440	31	28	5	1PN		6	2	0				4
181904	181440	31	28	6	2PN	2C	6	2	0				4
181904	181440	31	28	7	2PN		8	3	0				4
181904	181440	31	28	8	2PN		9	2	0	+			4
181904	181440	31	28	9	2PN	2C	8	3	0				4
181904	181440	31	28	10	2PN	2C	10	3	0				4
181904	181440	31	28	11	2PN	2C	8	3	0				4
181904	181440	31	28	12	2PN	2C	7	3	0				4
181904	181440	31	28	13	0PN	-	-	-	-	-	-	-	4
181904	181440	31	28	14	degenerate	-	-	-	-	-	-	-	4
181905	180380	35	39	1	3PN	-	-	-	-	-	-	-	5.2
181905	180380	35	39	2	2PN		8	3	0				5.2
181905	180380	35	39	3	2PN	2C	7	3	0				5.2
181905	180380	35	39	4	2PN		7	3	0				5.2
181905	180380	35	39	5	2PN		6	2	0				5.2
181905	180380	35	39	6	2PN	2C	7	3	0				5.2
181905	180380	35	39	7	2PN		8	3	0				5.2
181905	180380	35	39	8	2PN		6	2	10				5.2
181905	180380	35	39	9	2PN		8	4	0				5.2
181905	180380	35	39	10	2PN	2C	7	2	0	+			5.2
181905	180380	35	39	11	2PN		2	1	0				5.2
181905	180380	35	39	12	2PN		6	2	0				5.2
181905	180380	35	39	13	2PN		8	3	0	+			5.2
181905	180380	35	39	14	2PN	2C	8	3	0				5.2
181905	180380	35	39	15	2PN		8	3	0				5.2
181905	180380	35	39	16	0PN	-	-	-	-	-	-	-	5.2
181915	181447	29	28	1	2PN		5	2	0				5.2
181915	181447	29	28	2	2PN		4	2	15				5.2
181915	181447	29	28	3	0PN	-	-	-	-	-	-	-	5.2
181915	181447	29	28	4	2PN	2C	6	2	0				5.2
181915	181447	29	28	5	2PN	2C	8	3	0				5.2
181915	181447	29	28	6	2PN		6	2	10				5.2
181915	181447	29	28	7	2PN		7	2	0	+			5.2
181915	181447	29	28	8	2PN	2C	6	2	0				5.2
181915	181447	29	28	9	2PN	2C	8	3	0				5.2
181915	181447	29	28	10	2PN		4	2	0				5.2
181915	181447	29	28	11	2PN	2C	7	3	0				5.2
181915	181447	29	28	12	>3PN	-	-	-	-	-	-	-	5.2
181915	181447	29	28	13	MI	-	-	-	-	-	-	-	5.2
181915	181447	29	28	14	2PN	2C	6	2	0				5.2
181915	181447	29	28	15	2PN		4	2	20				5.2
181915	181447	29	28	16	2PN	2C	4	2	0				5.2
181915	181447	29	28	17	2PN	2C	8	3	0				5.2
181915	181447	29	28	18	2PN		5	2	0				5.2
181915	181447	29	28	19	2PN		2	1	0				5.2
181915	181447	29	28	20	degenerate	-	-	-	-	-	-	-	5.2
181925	181455	29	29	1	2PN	2C	8	3	0				4
181925	181455	29	29	2	2PN	2C	8	3	5				4
181925	181455	29	29	3	2PN		8	3	0				4
181925	181455	29	29	4	2PN	2C	8	3	0				4
181925	181455	29	29	5	2PN		8	3	10				4
181925	181455	29	29	6	2PN		8	3	5				4
181925	181455	29	29	7	2PN		10	3	5				4
181925	181455	29	29	8	2PN		8	3	0				4
181925	181455	29	29	9	3PN	-	-	-	-	-	-	-	4
181925	181455	29	29	10	2PN	2C	10	3	0				4
181933	181462	29	29	1	2PN	2C	5	2	0				4.1
181933	181462	29	29	2	2PN	2C	8	4	0				4.1
181933	181462	29	29	3	2PN	2C	8	3	0				4.1
181933	181462	29	29	4	0PN	-	-	-	-	-	-	-	4.1
181933	181462	29	29	5	MI	-	-	-	-	-	-	-	4.1
181933	181462	29	29	6	2PN		8	3	0				4.1
181933	181462	29	29	7	2PN	2C	8	4	0				4.1
181933	181462	29	29	8	2PN	2C	8	3	0				4.1
181933	181462	29	29	9	2PN	2C	8	3	0				4.1
181933	181462	29	29	10	2PN		8	3	0				4.1
181933	181462	29	29	11	2PN	2C	8	3	0				4.1
181933	181462	29	29	12	2PN		8	3	5				4.1
181933	181462	29	29	13	2PN	2C	8	4	0				4.1
181933	181462	29	29	14	2PN	2C	Compact	3	0				4.1
181942	181469	30	32	1	2PN		6	2	0	+			4.2
181942	181469	30	32	2	MI	-	-	-	-	-	-	-	4.2
181942	181469	30	32	3	3PN	-	-	-	-	-	-	-	4.2
181942	181469	30	32	4	2PN		7	3	0				4.2
181942	181469	30	32	5	2PN		8	3	0				4.2
181942	181469	30	32	6	2PN	2C	9	3	0				4.2
181942	181469	30	32	7	2PN		4	2	0				4.2
181942	181469	30	32	8	2PN		8	3	0				4.2
181942	181469	30	32	9	2PN		8	3	0				4.2
181942	181469	30	32	10	2PN		8	3	0				4.2
181942	181469	30	32	11	2PN		4	2	0	+			4.2
181942	181469	30	32	12	degenerate	-	-	-	-	-	-	-	4.2
181970	171674	25	29	1	2PN		10	2	15	+			5
181970	171674	25	29	2	2PN	2C	8	3	0				5
181970	171674	25	29	3	2PN	2C	8	3	10				5
181970	171674	25	29	4	2PN	2C	8	3	0				5
181970	171674	25	29	5	2PN		10	3	5				5
181970	171674	25	29	6	0PN	-	-	-	-	-	-	-	5
181970	171674	25	29	7	2PN		Compact	2	0				5
181970	171674	25	29	8	2PN		8	3	5				5
181970	171674	25	29	9	degenerate	-	-	-	-	-	-	-	5
181970	171674	25	29	10	degenerate	-	-	-	-	-	-	-	5
181979	181498	31	35	1	2PN		9	3	10				4.4
181979	181498	31	35	2	2PN	2C	11	2	0				4.4
181979	181498	31	35	3	2PN	2C	8	3	0				4.4
181979	181498	31	35	4	2PN	2C	8	3	0				4.4
181979	181498	31	35	5	2PN	2C	6	2	10				4.4
181979	181498	31	35	6	3PN	-	-	-	-	-	-	-	4.4
181979	181498	31	35	7	2PN	2C	4	2	0				4.4
181979	181498	31	35	8	2PN	2C	9	3	0	+			4.4
181979	181498	31	35	9	2PN	2C	7	3	5				4.4
181979	181498	31	35	10	2PN	2C	Compact	3	0				4.4
181979	181498	31	35	11	2PN	2C	8	3	0				4.4
181979	181498	31	35	12	degenerate	-	-	-	-	-	-	-	4.4
181982	152305	33	32	1	2PN		8	3	5				5.2
181982	152305	33	32	2	2PN		7	3	0				5.2
181982	152305	33	32	3	2PN		9	3	5				5.2
181982	152305	33	32	4	2PN	2C	7	3	0				5.2
181982	152305	33	32	5	degenerate	-	-	-	-	-	-	-	5.2
181982	152305	33	32	6	2PN		5	2	0				5.2
181982	152305	33	32	7	MI	-	-	-	-	-	-	-	5.2
181982	152305	33	32	8	2PN		6	2	5				5.2
181982	152305	33	32	9	2PN		8	3	0				5.2
181982	152305	33	32	10	2PN		4	2	0				5.2
181982	152305	33	32	11	2PN		8	3	0				5.2
181982	152305	33	32	12	2PN		7	3	0	+			5.2
181982	152305	33	32	13	2PN		7	3	0				5.2
181982	152305	33	32	14	0PN	-	-	-	-	-	-	-	5.2
181982	152305	33	32	15	2PN		4	2	0				5.2
181982	152305	33	32	16	GV	-	-	-	-	-	-	-	5.2
181983	181500	33	32	1	2PN		6	2	0				4.9
181983	181500	33	32	2	2PN	2C	8	3	0				4.9
181983	181500	33	32	3	2PN	2C	8	3	0				4.9
181983	181500	33	32	4	2PN		3	1	0				4.9
181983	181500	33	32	5	0PN	2C	14	2	0				4.9
181983	181500	33	32	6	0PN	-	-	-	-	-	-	-	4.9
181983	181500	33	32	7	1PN	2C	8	3	0	+			4.9
181983	181500	33	32	8	2PN		9	3	0				4.9
181983	181500	33	32	9	2PN	2C	8	3	0				4.9
181983	181500	33	32	10	3PN	-	-	-	-	-	-	-	4.9
181983	181500	33	32	11	2PN	2C	8	3	0				4.9
181983	181500	33	32	12	2PN	2C	8	3	0				4.9
181983	181500	33	32	13	2PN	2C	9	3	0				4.9
181983	181500	33	32	14	2PN		10	3	5				4.9
181993	181510	24	28	1	3PN	-	-	-	-	-	-	-	4.6
181993	181510	24	28	2	0PN	-	-	-	-	-	-	-	4.6
181993	181510	24	28	3	2PN	2C	6	2	0				4.6
181993	181510	24	28	4	3PN	-	-	-	-	-	-	-	4.6
181993	181510	24	28	5	2PN	2C	8	3	0				4.6
181993	181510	24	28	6	2PN		7	3	0				4.6
181993	181510	24	28	7	3PN	-	-	-	-	-	-	-	4.6
181993	181510	24	28	8	2PN		8	3	0				4.6
181993	181510	24	28	9	2PN	2C	10	3	0				4.6
181993	181510	24	28	10	2PN		2	1	0				4.6
181993	181510	24	28	11	2PN		5	2	5				4.6
181993	181510	24	28	12	2PN		8	3	0				4.6
181993	181510	24	28	13	2PN		7	3	15				4.6
181993	181510	24	28	14	2PN		8	3	5				4.6
181993	181510	24	28	15	GV	-	-	-	-	-	-	-	4.6
181997	180155	28	31	1	3PN	-	-	-	-	-	-	-	2.6
181997	180155	28	31	2	MI	-	-	-	-	-	-	-	2.6
181997	180155	28	31	3	2PN	2C	8	3	0				2.6
181997	180155	28	31	4	2PN	2C	7	3	5	+			2.6
181997	180155	28	31	5	3PN	-	-	-	-	-	-	-	2.6
181997	180155	28	31	6	0PN	-	-	-	-	-	-	-	2.6
181997	180155	28	31	7	2PN	4C	5	2	20				2.6
181997	180155	28	31	8	2PN	2C	8	3	5				2.6
181998	181514	34	28	1	0PN	2C	12	2	0				2.8
181998	181514	34	28	2	1PN	2C	12	2	0				2.8
181998	181514	34	28	3	2PN		7	3	5				2.8
181998	181514	34	28	4	2PN	2C	4	2	5				2.8
181998	181514	34	28	5	2PN	2C	6	2	0				2.8
181998	181514	34	28	6	MI	-	-	-	-	-	-	-	2.8
181998	181514	34	28	7	2PN	2C	8	3	0				2.8
181998	181514	34	28	8	2PN	2C	12	2	0				2.8
181998	181514	34	28	9	MI	-	-	-	-	-	-	-	2.8
181998	181514	34	28	10	2PN	2C	8	3	0				2.8
182000	181516	31	33	1	3PN	-	-	-	-	-	-	-	5.8
182000	181516	31	33	2	2PN		10	3	0				5.8
182000	181516	31	33	3	2PN	2C	7	3	0				5.8
182000	181516	31	33	4	2PN	2C	9	3	0	+			5.8
182000	181516	31	33	5	2PN	2C	9	3	0	+			5.8
182000	181516	31	33	6	2PN		8	4	0				5.8
182000	181516	31	33	7	2PN	4C	10	3	0				5.8
182000	181516	31	33	8	2PN	2C	12	2	0				5.8
182000	181516	31	33	9	2PN		9	3	0	+			5.8
182032	181541	27	28	1	3PN	-	-	-	-	-	-	-	2.9
182032	181541	27	28	2	2PN		7	3	0				2.9
182032	181541	27	28	3	2PN		arrest	-	-	-	-	-	2.9
182032	181541	27	28	4	2PN		6	2	5				2.9
182032	181541	27	28	5	1PN	-	-	-	-	-	-	-	2.9
182032	181541	27	28	6	2PN		7	3	5				2.9
182032	181541	27	28	7	3PN	-	-	-	-	-	-	-	2.9
182032	181541	27	28	8	2PN	2C	7	3	0				2.9
182032	181541	27	28	9	2PN	2C	8	3	0				2.9
182032	181541	27	28	10	2PN		6	2	0				2.9
182032	181541	27	28	11	0PN	-	-	-	-	-	-	-	2.9
182032	181541	27	28	12	2PN		7	2	25				2.9
182032	181541	27	28	13	2PN		arrest	-	-	-	-	-	2.9
182032	181541	27	28	14	2PN		6	2	10	+			2.9
182032	181541	27	28	15	3PN	-	-	-	-	-	-	-	2.9
182032	181541	27	28	16	2PN		8	3	0				2.9
182032	181541	27	28	17	2PN		8	3	0				2.9
182032	181541	27	28	18	2PN		7	3	0				2.9
182032	181541	27	28	19	2PN		4	2	0				2.9
182032	181541	27	28	20	degenerate	-	-	-	-	-	-	-	2.9
182032	181541	27	28	21	GV	-	-	-	-	-	-	-	2.9
182032	181541	27	28	22	degenerate	-	-	-	-	-	-	-	2.9
182040	181549	29	29	1	3PN	-	-	-	-	-	-	-	4.4
182040	181549	29	29	2	3PN	-	-	-	-	-	-	-	4.4
182040	181549	29	29	3	2PN		7	2	5	+			4.4
182040	181549	29	29	4	2PN	2C	7	3	0				4.4
182040	181549	29	29	5	2PN	2C	8	3	0				4.4
182040	181549	29	29	6	2PN	2C	8	3	0				4.4
182040	181549	29	29	7	3PN	-	-	-	-	-	-	-	4.4
182040	181549	29	29	8	2PN		arrest	-	-	-	-	-	4.4
182040	181549	29	29	9	3PN	-	-	-	-	-	-	-	4.4
182040	181549	29	29	10	2PN	2C	8	3	0				4.4
182040	181549	29	29	11	2PN	2C	10	3	0				4.4
182040	181549	29	29	12	3PN	-	-	-	-	-	-	-	4.4
182040	181549	29	29	13	3PN	-	-	-	-	-	-	-	4.4
182040	181549	29	29	14	2PN		8	3	0				4.4
182045	181553	36	35	1	2PN	2C	8	3	0				1.8
182045	181553	36	35	2	2PN	4C	12	2	5	+			1.8
182045	181553	36	35	3	2PN		11	2	5	+			1.8
182045	181553	36	35	4	2PN		7	3	0				1.8
182045	181553	36	35	5	2PN		5	1	30				1.8
182045	181553	36	35	6	2PN	2C	8	3	0				1.8
182045	181553	36	35	7	2PN	2C	6	2	0				1.8
182045	181553	36	35	8	2PN	2C	8	3	0				1.8
182045	181553	36	35	9	degenerate	-	-	-	-	-	-	-	1.8
182045	181553	36	35	10	degenerate	-	-	-	-	-	-	-	1.8
182052	181558	35	34	1	2PN		9	3	0				6.4
182052	181558	35	34	2	2PN		6	2	0				6.4
182052	181558	35	34	3	2PN	2C	8	4	0				6.4
182052	181558	35	34	4	2PN		8	3	0				6.4
182052	181558	35	34	5	2PN		6	2	5				6.4
182052	181558	35	34	6	MI	-	-	-	-	-	-	-	6.4
182052	181558	35	34	7	2PN		6	2	5				6.4
182052	181558	35	34	8	2PN		6	2	0				6.4
182052	181558	35	34	9	0PN	-	-	-	-	-	-	-	6.4
182052	181558	35	34	10	2PN	2C	8	3	0				6.4
182052	181558	35	34	11	2PN		Compact	3	0				6.4
182052	181558	35	34	12	2PN		5	2	0				6.4
182052	181558	35	34	13	2PN		5	2	0				6.4
182052	181558	35	34	14	2PN		6	2	0				6.4
182052	181558	35	34	15	2PN	2C	8	4	0				6.4
182052	181558	35	34	16	GV	-	-	-	-	-	-	-	6.4
182068	181569	37	39	1	3PN	-	-	-	-	-	-	-	5.7
182068	181569	37	39	2	2PN	2C	8	3	0				5.7
182068	181569	37	39	3	2PN	2C	8	3	0				5.7
182068	181569	37	39	4	0PN	-	-	-	-	-	-	-	5.7
182068	181569	37	39	5	2PN		9	2	5	+			5.7
182068	181569	37	39	6	2PN		6	2	5				5.7
182068	181569	37	39	7	2PN		5	2	0				5.7
182068	181569	37	39	8	2PN		3	1	0				5.7
182068	181569	37	39	9	0PN	-	-	-	-	-	-	-	5.7
182088	181587	29	30	1	0PN	3C	14	2	5				4.1
182088	181587	29	30	2	3PN	-	-	-	-	-	-	-	4.1
182088	181587	29	30	3	2PN	2C	8	3	0				4.1
182088	181587	29	30	4	2PN	2C	8	3	5				4.1
182088	181587	29	30	5	0PN	2C	14	2	0				4.1
182088	181587	29	30	6	2PN	2C	8	3	0				4.1
182088	181587	29	30	7	2PN	2C	9	3	0				4.1
182088	181587	29	30	8	2PN	2C	8	3	10				4.1
182088	181587	29	30	9	2PN	2C	8	3	0				4.1
182088	181587	29	30	10	GV	-	-	-	-	-	-	-	4.1
182136	181625	27	31	1	2PN	2C	Compact	3	0				4.3
182136	181625	27	31	2	0PN	-	-	-	-	-	-	-	4.3
182136	181625	27	31	3	MI	-	-	-	-	-	-	-	4.3
182136	181625	27	31	4	2PN		8	3	0				4.3
182136	181625	27	31	5	0PN		6	2	0				4.3
182136	181625	27	31	6	0PN		2	1	0				4.3
182136	181625	27	31	7	2PN	2C	Compact	3	0				4.3
182136	181625	27	31	8	2PN	2C	8	3	0				4.3
182136	181625	27	31	9	2PN		8	3	0				4.3
182136	181625	27	31	10	2PN	2C	Compact	2	0				4.3
182138	181627	28	36	1	>3PN	-	-	-	-	-	-	-	8.4
182138	181627	28	36	2	2PN	2C	7	3	0				8.4
182138	181627	28	36	3	0PN	-	-	-	-	-	-	-	8.4
182138	181627	28	36	4	2PN	2C	7	3	0				8.4
182138	181627	28	36	5	2PN	2PN	5	2	0				8.4
182138	181627	28	36	6	2PN	2C	4	2	0				8.4
182138	181627	28	36	7	2PN		8	3	0				8.4
182138	181627	28	36	8	>3PN	-	-	-	-	-	-	-	8.4
182138	181627	28	36	9	2PN		8	3	0				8.4
182138	181627	28	36	10	2PN	2PN	4	2	0				8.4
182140	181629	30	32	1	0PN	2C	14	2	0				9
182140	181629	30	32	2	0PN	2C	10	2	0				9
182140	181629	30	32	3	0PN	3C	11	2	0				9
182140	181629	30	32	4	2PN	2C	Compact	3	0				9
182140	181629	30	32	5	2PN	2PN	7	2	10	+			9
182140	181629	30	32	6	0PN	2C	8	3	0				9
182140	181629	30	32	7	3PN	-	-	-	-	-	-	-	9
182140	181629	30	32	8	2PN		7	2	10	+			9
182140	181629	30	32	9	MI	-	-	-	-	-	-	-	9
182140	181629	30	32	10	MI	-	-	-	-	-	-	-	9
182140	181629	30	32	11	2PN		7	3	10				9
182153	172885	37	41	1	2PN		7	2	5	+			5.7
182153	172885	37	41	2	2PN		4	1	30				5.7
182153	172885	37	41	3	2PN	2C	8	3	0				5.7
182153	172885	37	41	4	2PN		5	2	15				5.7
182153	172885	37	41	5	2PN		6	1	30				5.7
182153	172885	37	41	6	2PN	2C	8	3	0				5.7
182153	172885	37	41	7	2PN	2PN	8	2	15	+			5.7
182153	172885	37	41	8	2PN		6	2	15				5.7
182153	172885	37	41	9	3PN	-	-	-	-	-	-	-	5.7
182153	172885	37	41	10	2PN	2C	9	3	0				5.7
182153	172885	37	41	11	2PN	2C	11	2	0	+			5.7
182153	172885	37	41	12	2PN	2C	10	3	0				5.7
182153	172885	37	41	13	2PN	2C	7	3	5				5.7
182166	181651	32	34	1	2PN	2C	9	3	0				5.1
182166	181651	32	34	2	2PN	2C	10	3	5				5.1
182166	181651	32	34	3	2PN		4	2	0				5.1
182166	181651	32	34	4	2PN	2C	8	3	0				5.1
182166	181651	32	34	5	2PN		9	3	5	+			5.1
182166	181651	32	34	6	2PN	2C	8	3	0	+			5.1
182166	181651	32	34	7	2PN	2C	11	2	5				5.1
182166	181651	32	34	8	1PN		4	2	0				5.1
182166	181651	32	34	9	2PN	2C	Compact	2	0				5.1
182166	181651	32	34	10	GV	-	-	-	-	-	-	-	5.1
182166	181651	32	34	11	GV	-	-	-	-	-	-	-	5.1
182177	181659	28	28	1	2PN	2PN	2	1	30				5.5
182177	181659	28	28	2	2PN	2C	8	3	0				5.5
182177	181659	28	28	3	2PN	2C	8	3	5				5.5
182177	181659	28	28	4	2PN	2C	Compact	3	0				5.5
182177	181659	28	28	5	3PN	-	-	-	-	-	-	-	5.5
182177	181659	28	28	6	2PN	2C	8	3	0				5.5
182177	181659	28	28	7	2PN	2C	7	3	0				5.5
182177	181659	28	28	8	2PN	2PN	9	2	20	+			5.5
182177	181659	28	28	9	2PN	2C	8	4	0				5.5
182177	181659	28	28	10	2PN	2C	10	2	5	+			5.5
182177	181659	28	28	11	>3PN	-	-	-	-	-	-	-	5.5
182177	181659	28	28	12	2PN	2C	8	3	0				5.5
182177	181659	28	28	13	2PN	2C	8	3	0				5.5
182231	181706	29	33	1	0PN	-	-	-	-	-	-	-	4.4
182231	181706	29	33	2	MI	-	-	-	-	-	-	-	4.4
182231	181706	29	33	3	0PN	-	-	-	-	-	-	-	4.4
182231	181706	29	33	4	2PN		8	3	0				4.4
182231	181706	29	33	5	MI	-	-	-	-	-	-	-	4.4
182231	181706	29	33	6	2PN		9	3	5				4.4
182231	181706	29	33	7	2PN	2C	8	3	0				4.4
182231	181706	29	33	8	0PN	-	-	-	-	-	-	-	4.4
182231	181706	29	33	9	2PN		8	3	0				4.4
182231	181706	29	33	10	2PN	2PN	6	2	0				4.4
182231	181706	29	33	11	2PN	2PN			0				4.4
182233	181708	32	34	1	3PN	-	-	-	-	-	-	-	2.4
182233	181708	32	34	2	2PN	2C	8	3	0				2.4
182233	181708	32	34	3	2PN		7	3	0				2.4
182233	181708	32	34	4	2PN		8	4	0				2.4
182233	181708	32	34	5	2PN	2PN	5	2	0				2.4
182233	181708	32	34	6	2PN	2C	9	3	5				2.4
182233	181708	32	34	7	2PN	2PN	5	2	0				2.4
182233	181708	32	34	8	2PN	2PN	6	2	0				2.4
182233	181708	32	34	9	GV	-	-	-	-	-	-	-	2.4
182233	181708	32	34	10	degenerate	-	-	-	-	-	-	-	2.4
182265	181735	31	31	1	2PN	2C	8	3	0				5.2
182265	181735	31	31	2	GV	-	-	-	-	-	-	-	5.2
182265	181735	31	31	3	2PN	2C	11	2	0				5.2
182265	181735	31	31	4	2PN	2C	4	2	10				5.2
182265	181735	31	31	5	2PN	2C	8	3	0				5.2
182265	181735	31	31	6	0PN	-	-	-	-	-	-	-	5.2
182265	181735	31	31	7	MI	-	-	-	-	-	-	-	5.2
182265	181735	31	31	8	2PN	2C	12	2	0				5.2
182265	181735	31	31	9	2PN		10	3	0	+			5.2
182265	181735	31	31	10	2PN		9	3	0				5.2
182265	181735	31	31	11	3PN	-	-	-	-	-	-	-	5.2
182265	181735	31	31	12	GV	-	-	-	-	-	-	-	5.2
182267	181737	31	29	1	2PN		8	3	0				3.4
182267	181737	31	29	2	2PN	2C	Compact	3	0				3.4
182267	181737	31	29	3	2PN	2C	Compact	2	0				3.4
182267	181737	31	29	4	2PN		8	3	0				3.4
182267	181737	31	29	5	0PN	-	-	-	-	-	-	-	3.4
182267	181737	31	29	6	2PN	2C	8	3	0				3.4
182267	181737	31	29	7	>3PN	-	-	-	-	-	-	-	3.4
182267	181737	31	29	8	1PN	2C	10	3	0				3.4
182267	181737	31	29	9	>3PN	-	-	-	-	-	-	-	3.4
182267	181737	31	29	10	3PN	-	-	-	-	-	-	-	3.4
182267	181737	31	29	11	2PN	2C	8	3	5				3.4
182267	181737	31	29	12	0PN	-	-	-	-	-	-	-	3.4
182268	181738	38	36	1	2PN	2C	8	3	0				6.5
182268	181738	38	36	2	1PN	2C	8	3	0				6.5
182268	181738	38	36	3	2PN	2C	9	3	0				6.5
182268	181738	38	36	4	2PN	2C	8	3	0				6.5
182268	181738	38	36	5	0PN	2C	9	3	0				6.5
182268	181738	38	36	6	2PN	2C	7	3	0				6.5
182268	181738	38	36	7	2PN	2C	Compact	3	0				6.5
182268	181738	38	36	8	2PN	2C	Compact	3	0				6.5
182268	181738	38	36	9	degenerate	-	-	-	-	-	-	-	6.5
182320	181778	30	28	1	2PN	2C	7	3	0				4.1
182320	181778	30	28	2	2PN	2C	8	3	0				4.1
182320	181778	30	28	3	2PN		8	3	0				4.1
182320	181778	30	28	4	2PN		10	3	0				4.1
182320	181778	30	28	5	2PN	2C	8	3	0				4.1
182320	181778	30	28	6	2PN	2PN	3	1	0				4.1
182320	181778	30	28	7	2PN	2C	10	3	5				4.1
182320	181778	30	28	8	2PN		6	2	0				4.1
182320	181778	30	28	9	2PN	2PN	6	2	0				4.1
182320	181778	30	28	10	3PN	-	-	-	-	-	-	-	4.1
182320	181778	30	28	11	2PN	2PN	6	2	0				4.1
182320	181778	30	28	12	3PN	-	-	-	-	-	-	-	4.1
182320	181778	30	28	13	2PN	2PN	7	3	0	+			4.1
182382	181830	35	39	1	2PN	2C	5	2	0				2.6
182382	181830	35	39	2	2PN	2C	7	3	5				2.6
182382	181830	35	39	3	0PN	2C	8	3	0				2.6
182382	181830	35	39	4	>3PN	-	-	-	-	-	-	-	2.6
182382	181830	35	39	5	0PN	2C	4	2	0	+			2.6
182382	181830	35	39	6	2PN	2C	8	3	0				2.6
182382	181830	35	39	7	2PN	2C	8	3	0				2.6
182382	181830	35	39	8	2PN	2C	8	3	5				2.6
182382	181830	35	39	9	2PN	2C	8	3	0				2.6
182382	181830	35	39	10	2PN	2C	4	2	10				2.6
182382	181830	35	39	11	3PN	-	-	-	-	-	-	-	2.6
182382	181830	35	39	12	2PN	2C	9	3	5				2.6
182383	181831	37	38	1	2PN	2C	7	3	5				3.8
182383	181831	37	38	2	2PN		8	3	0	+			3.8
182383	181831	37	38	3	MI	-	-	-	-	-	-	-	3.8
182383	181831	37	38	4	2PN	2PN	4	1	30				3.8
182383	181831	37	38	5	2PN	2C	7	3	5				3.8
182383	181831	37	38	6	2PN		8	3	0				3.8
182383	181831	37	38	7	3PN	-	-	-	-	-	-	-	3.8
182383	181831	37	38	8	2PN		9	3	0	+			3.8
182383	181831	37	38	9	3PN	-	-	-	-	-	-	-	3.8
182383	181831	37	38	10	2PN	2C	5	2	0	+			3.8
182383	181831	37	38	11	3PN	-	-	-	-	-	-	-	3.8
182383	181831	37	38	12	GV	-	-	-	-	-	-	-	3.8
182415	181859	31	38	1	2PN	2C	9	3	0				3.4
182415	181859	31	38	2	2PN	2C	8	3	0				3.4
182415	181859	31	38	3	3PN	-	-	-	-	-	-	-	3.4
182415	181859	31	38	4	2PN	2C	4	2	0				3.4
182415	181859	31	38	5	2PN	2C	7	3	0				3.4
182415	181859	31	38	6	2PN	2C	8	3	0				3.4
182415	181859	31	38	7	GV	-	-	-	-	-	-	-	3.4
182415	181859	31	38	8	degenerate	-	-	-	-	-	-	-	3.4
182417	181861	26	26	1	3PN	-	-	-	-	-	-	-	6.5
182417	181861	26	26	2	2PN	2C	7	3	0				6.5
182417	181861	26	26	3	2PN	2C	7	3	0	+			6.5
182417	181861	26	26	4	2PN		8	2	10	+			6.5
182417	181861	26	26	5	3PN	-	-	-	-	-	-	-	6.5
182417	181861	26	26	6	2PN		7	3	0				6.5
182417	181861	26	26	7	2PN	2PN	7	2	15	+			6.5
182417	181861	26	26	8	2PN		8	3	0				6.5
182417	181861	26	26	9	3PN	-	-	-	-	-	-	-	6.5
182417	181861	26	26	10	0PN	-	-	-	-	-	-	-	6.5
182505	181927	33	30	1	2PN	2C	8	3	5				3.5
182505	181927	33	30	2	2PN	2C	7	3	0				3.5
182505	181927	33	30	3	2PN	2C	9	3	0				3.5
182505	181927	33	30	4	GV	-	-	-	-	-	-	-	3.5
182505	181927	33	30	5	2PN	2PN	8	3	0				3.5
182505	181927	33	30	6	2PN		7	3	0				3.5
182505	181927	33	30	7	2PN	2PN	8	3	5				3.5
182505	181927	33	30	8	2PN		8	3	0				3.5
182505	181927	33	30	9	0PN	-	-	-	-	-	-	-	3.5
182505	181927	33	30	10	MI	-	-	-	-	-	-	-	3.5
182505	181927	33	30	11	2PN		8	3	5				3.5
182505	181927	33	30	12	GV	-	-	-	-	-	-	-	3.5
182505	181927	33	30	13	GV	-	-	-	-	-	-	-	3.5
